# Supplementary material for: New light on the imbroglio surrounding the C 8 H+6 isomers formed from ionized azulene and naphthalene using ion–molecule reactions
Source: Royal Society of Chemistry journal article supplement (doi:10.1039/d3sc03015f), 2023-11-24
Supplement: d3sc03015f1.pdf [file d3sc03015f1.pdf]

# New light on the imbroglia surrounding the $C_8H_6^+$ isomers formed from ionized azulene and naphthalene using ion-molecule reactions

Corentin Rossi, Giel Muller, Roland Thissen, Claire Romanzin, Christian Alcaraz, Sandesh Gondarry, Paul M. Mayer, and Ugo Jacovella

## Contents

|   |                             |   |
|---|-----------------------------|---|
| 1 | Chemicals                   | 3 |
| 2 | Cross section determination | 3 |
| 3 | Supplementary Figures       | 4 |
| 4 | Supplementary Tables        | 7 |

## List of Figures

|    |                                                                                                                                                                                                                                                                                                                                                                                                                             |   |
|----|-----------------------------------------------------------------------------------------------------------------------------------------------------------------------------------------------------------------------------------------------------------------------------------------------------------------------------------------------------------------------------------------------------------------------------|---|
| S1 | Mass spectra of $C_8H_6^+$ generated by photoionization of <b>PA</b> at photon energies of 13.5 and 14.5 eV, reacting with Propyne and Allene . . . . .                                                                                                                                                                                                                                                                     | 4 |
| S2 | Mass spectra of $C_8H_6^+$ generated by dissociative ionization of <b>Naph</b> at a photon energy of 18 eV, reacting with Propyne and Allene . . . . .                                                                                                                                                                                                                                                                      | 5 |
| S3 | Mass spectra of $C_8H_6^+$ generated by dissociative ionization of <b>Azu</b> at a photon energy of 18 eV, reacting with Propyne and Allene . . . . .                                                                                                                                                                                                                                                                       | 5 |
| S4 | Reaction cross sections including error bars of $C_8H_6^+$ from <b>PA</b> with propyne and allene . . . . .                                                                                                                                                                                                                                                                                                                 | 6 |
| S5 | Reaction cross sections including error bars of $C_8H_6^+$ from <b>Naph</b> and <b>Azu</b> with propyne and allene . . . . .                                                                                                                                                                                                                                                                                                | 6 |
| S6 | Reaction cross section of $C_8H_6^+$ with propyne as a function of collision energy . . . . .                                                                                                                                                                                                                                                                                                                               | 7 |
| S7 | Microcanonical rate constants for interconversion from <b>PA</b> <sup>+</sup> to <b>1</b> <sup>+</sup> , <b>2</b> <sup>+</sup> , <b>3</b> <sup>+</sup> , <b>4</b> <sup>+</sup> , and <b>10</b> <sup>+</sup> (solid lines) and the corresponding back reactions (dashed lines) as a function of the internal energy of <b>PA</b> <sup>+</sup> . The shaded grey area represents the energies accessible in region 2. . . . . | 7 |

## List of Tables

|    |                                                                                          |    |
|----|------------------------------------------------------------------------------------------|----|
| S1 | Reaction products for $C_8H_6^+$ from <b>PA</b> . . . . .                                | 8  |
| S2 | Reaction products for $C_8H_6^+$ from <b>Naph</b> and <b>Azu</b> . . . . .               | 8  |
| S3 | Reaction cross sections to form $m/z$ 115 from <b>PA</b> with allene part I . . . . .    | 9  |
| S4 | Reaction cross sections to form $m/z$ 115 from <b>PA</b> with allene part II . . . . .   | 10 |
| S5 | Reaction cross sections to form $m/z$ 115 from <b>Naph</b> with allene . . . . .         | 11 |
| S6 | Reaction cross sections to form $m/z$ 115 from <b>Azu</b> with allene . . . . .          | 12 |
| S7 | Equilibrium structure of <b>PA</b> <sup>+</sup> ( $\omega$ B97X-D/aug-cc-pVTZ) . . . . . | 13 |

|     |                                                                             |    |
|-----|-----------------------------------------------------------------------------|----|
| S8  | Equilibrium structure of $\mathbf{PE}^+$ ( $\omega$ B97X-D/aug-cc-pVTZ)     | 13 |
| S9  | Equilibrium structure of $\mathbf{BCB}^+$ ( $\omega$ B97X-D/aug-cc-pVTZ)    | 14 |
| S10 | Equilibrium structure of $\mathbf{1}^+$ ( $\omega$ B97X-D/aug-cc-pVTZ)      | 14 |
| S11 | Equilibrium structure of $\mathbf{2}^+$ ( $\omega$ B97X-D/aug-cc-pVTZ)      | 15 |
| S12 | Equilibrium structure of $\mathbf{3}^+$ ( $\omega$ B97X-D/aug-cc-pVTZ)      | 15 |
| S13 | Equilibrium structure of $\mathbf{4}^+$ ( $\omega$ B97X-D/aug-cc-pVTZ)      | 16 |
| S14 | Equilibrium structure of $\mathbf{5}^+$ ( $\omega$ B97X-D/aug-cc-pVTZ)      | 16 |
| S15 | Equilibrium structure of $\mathbf{6}^+$ ( $\omega$ B97X-D/aug-cc-pVTZ)      | 17 |
| S16 | Equilibrium structure of $\mathbf{7}^+$ ( $\omega$ B97X-D/aug-cc-pVTZ)      | 17 |
| S17 | Equilibrium structure of $\mathbf{8}^+$ ( $\omega$ B97X-D/aug-cc-pVTZ)      | 18 |
| S18 | Equilibrium structure of $\mathbf{9}^+$ ( $\omega$ B97X-D/aug-cc-pVTZ)      | 18 |
| S19 | Equilibrium structure of $\mathbf{10}^+$ ( $\omega$ B97X-D/aug-cc-pVTZ)     | 19 |
| S20 | Equilibrium structure of $\mathbf{11}^+$ ( $\omega$ B97X-D/aug-cc-pVTZ)     | 19 |
| S21 | Equilibrium structure of $\mathbf{12}^+$ ( $\omega$ B97X-D/aug-cc-pVTZ)     | 20 |
| S22 | Equilibrium structure of $\mathbf{13}^+$ ( $\omega$ B97X-D/aug-cc-pVTZ)     | 20 |
| S23 | Equilibrium structure of $\mathbf{14}^+$ ( $\omega$ B97X-D/aug-cc-pVTZ)     | 21 |
| S24 | Equilibrium structure of $\mathbf{PA-1}^+$ ( $\omega$ B97X-D/aug-cc-pVTZ)   | 22 |
| S25 | Equilibrium structure of $\mathbf{PA-2}^+$ ( $\omega$ B97X-D/aug-cc-pVTZ)   | 23 |
| S26 | Equilibrium structure of $\mathbf{PA-3}^+$ ( $\omega$ B97X-D/aug-cc-pVTZ)   | 24 |
| S27 | Equilibrium structure of $\mathbf{PA-4}^+$ ( $\omega$ B97X-D/aug-cc-pVTZ)   | 25 |
| S28 | Equilibrium structure of $\mathbf{PA-8}^+$ ( $\omega$ B97X-D/aug-cc-pVTZ)   | 26 |
| S29 | Equilibrium structure of $\mathbf{PA-10}^+$ ( $\omega$ B97X-D/aug-cc-pVTZ)  | 27 |
| S30 | Equilibrium structure of $\mathbf{1-6}^+$ ( $\omega$ B97X-D/aug-cc-pVTZ)    | 28 |
| S31 | Equilibrium structure of $\mathbf{2-5}^+$ ( $\omega$ B97X-D/aug-cc-pVTZ)    | 29 |
| S32 | Equilibrium structure of $\mathbf{2-7}^+$ ( $\omega$ B97X-D/aug-cc-pVTZ)    | 30 |
| S33 | Equilibrium structure of $\mathbf{3-5}^+$ ( $\omega$ B97X-D/aug-cc-pVTZ)    | 31 |
| S34 | Equilibrium structure of $\mathbf{4-6}^+$ ( $\omega$ B97X-D/aug-cc-pVTZ)    | 32 |
| S35 | Equilibrium structure of $\mathbf{7-8}^+$ ( $\omega$ B97X-D/aug-cc-pVTZ)    | 33 |
| S36 | Equilibrium structure of $\mathbf{7-9}^+$ ( $\omega$ B97X-D/aug-cc-pVTZ)    | 34 |
| S37 | Equilibrium structure of $\mathbf{8-10}^+$ ( $\omega$ B97X-D/aug-cc-pVTZ)   | 35 |
| S38 | Equilibrium structure of $\mathbf{9-11}^+$ ( $\omega$ B97X-D/aug-cc-pVTZ)   | 36 |
| S39 | Equilibrium structure of $\mathbf{10-12}^+$ ( $\omega$ B97X-D/aug-cc-pVTZ)  | 37 |
| S40 | Equilibrium structure of $\mathbf{10-13}^+$ ( $\omega$ B97X-D/aug-cc-pVTZ)  | 38 |
| S41 | Equilibrium structure of $\mathbf{11-BCB}^+$ ( $\omega$ B97X-D/aug-cc-pVTZ) | 39 |
| S42 | Equilibrium structure of $\mathbf{12-BCB}^+$ ( $\omega$ B97X-D/aug-cc-pVTZ) | 40 |
| S43 | Equilibrium structure of $\mathbf{BCB-PE}^+$ ( $\omega$ B97X-D/aug-cc-pVTZ) | 41 |

# 1 Chemicals

**PA** (98% purity), **Naph** (99% purity), and **Azu** (99% purity) were purchased from Sigma-Aldrich. Propyne (99% purity) and allene (96% purity) were purchased from ABCR GMBH – Germany. All samples were used without further purification.

## 2 Cross section determination

Reaction cross sections are derived from the Beer-Lambert law.

As detailed in [Cunha de Miranda et al. \[2015\]](#), when reactant ions pass the scattering cell, the infinitesimal increase of product ions is:

$$dI_{\text{pro}} = -dI_{\text{par}} = I_{\text{par}}(x) \cdot n\sigma \cdot dx, \quad (1)$$

where  $I_{\text{pro}}$  are the product ions,  $I_{\text{par}}$  the parent ions and  $n$  is the neutral density in the scattering cell. Integration along the length  $l_{\text{Cell}}$  of the scattering cell yields to:

$$I_{\text{par}}(l_{\text{Cell}}) = I_0 \cdot \exp(-n \cdot \sigma \cdot l_{\text{Cell}}) \Leftrightarrow \sigma = -\frac{1}{n \cdot l_{\text{Cell}}} \cdot \ln\left(\frac{I_{\text{par}}(l_{\text{Cell}})}{I_0}\right) \quad (2)$$

with  $I_0$  being the parent ion intensity at the entrance of the scattering cell. As  $I_{\text{par}} = I_0 - I_{\text{pro}}$ , we have

$$\sigma = -\frac{1}{n \cdot l_{\text{Cell}}} \cdot \ln\left(\frac{I_0 - I_{\text{pro}}}{I_0}\right) = -\frac{1}{n \cdot l_{\text{Cell}}} \cdot \ln\left(1 - \frac{I_{\text{pro}}}{I_0}\right) \quad (3)$$

If  $I_{\text{pro}} \ll I_0$  (less than 10%),  $\sigma$  can be approximated using  $\ln(1 - x) = -x$  for  $x \ll 1$ , leading to

$$\sigma = \frac{1}{n \cdot l_{\text{Cell}}} \cdot \frac{I_{\text{pro}}}{I_0} \quad (4)$$

As the scattering cell is an open device, pressure is not completely uniform inside. Also, reactions are possible with the diffused gas molecules outside the scattering cell. It is therefore appropriate to replace  $l_{\text{Cell}}$  by an effective length  $l_{\text{eff}}$  and to determine its value by a calibration. Like many other groups, we use the results of [Ervin and Armentrout \[1985\]](#) for the reaction  $\text{Ar}^+ + \text{D}_2 \rightarrow \text{ArD}^+ + \text{D}$ . The kinematics of this reaction ensures that no calibration uncertainties arise from different masses or velocities of products and parents. We finally obtain

$$\sigma = \frac{9.14 \times 10^4}{P(\text{in nbar})} \cdot \frac{I_{\text{pro}}}{I_0} \quad (5)$$

where the pressure  $P$  is measured with a differential baratron (MKS 398H digital manometer). Neutral gas is supplied at maximum pressures of 100 nbar. We take care to ensure single collision conditions, which in practice means that attenuation of the parent ion beam should be smaller than 10%.

In order to correct for reactions occurring outside of the cell by interaction of parent ions with the diffused gas, two measurements are systematically performed with the same flux of neutral gas sent either in the cell or in the chamber containing the cell. By this, we derive two values of sigma,  $\sigma_{\text{cell}}$ , which represents reactions occurring in the cell and in the diffusion path to the pump and  $\sigma_{\text{chamber}}$ , which represents only the reactions occurring on the diffusion path to the pump. The difference between the two values  $\sigma_{\text{cell}} - \sigma_{\text{chamber}}$  is the final value of cross section, tabulated in the present study.

### 3 Supplementary Figures

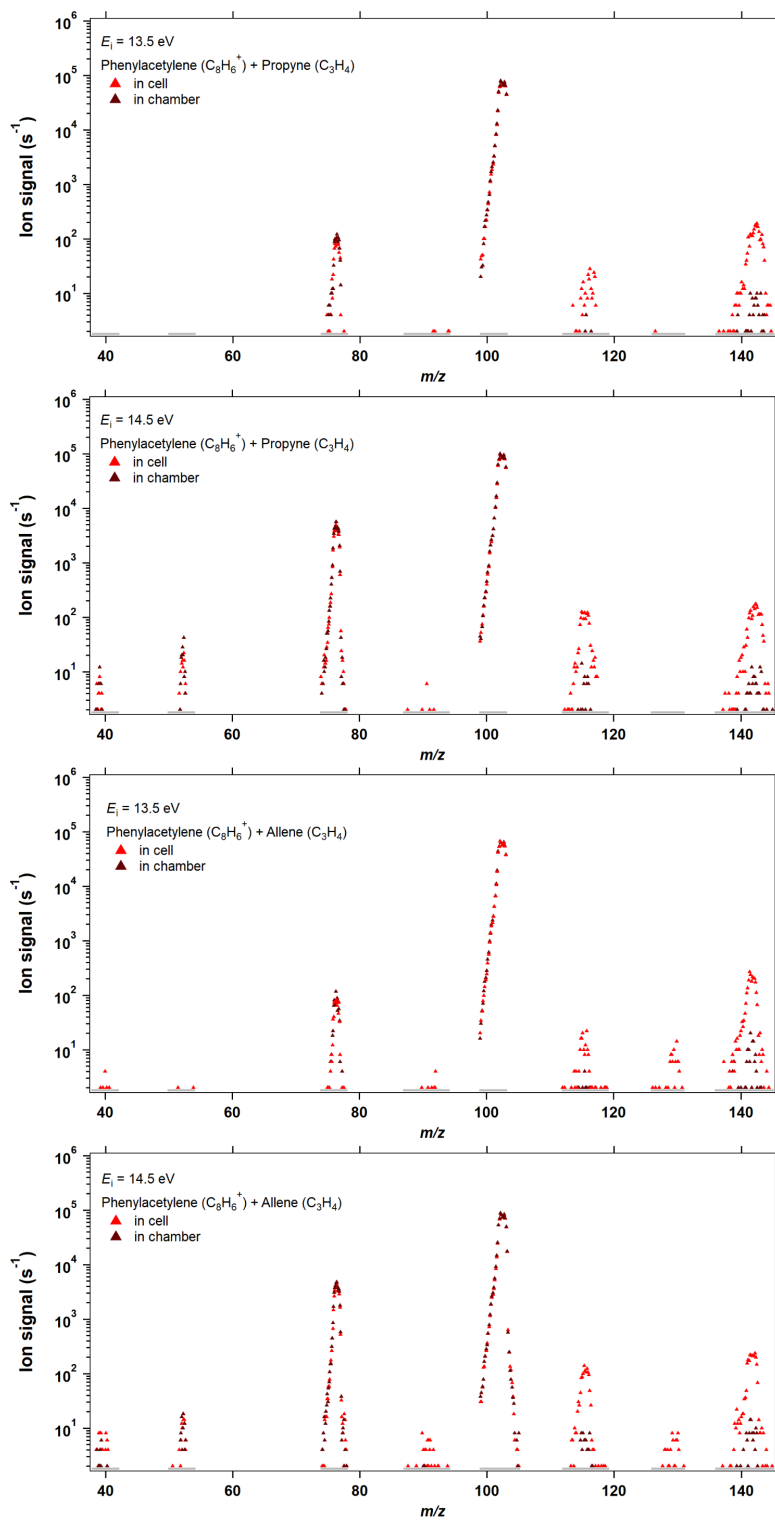

**Figure S1:** Mass spectra of  $\text{C}_8\text{H}_6^+$  generated by photoionization of **PA** at two different photon energies, reacting with Propyne (top panels) and Allene (bottom panels). The mass range was scanned in different segments, indicated by the gray bars on the x-axis.

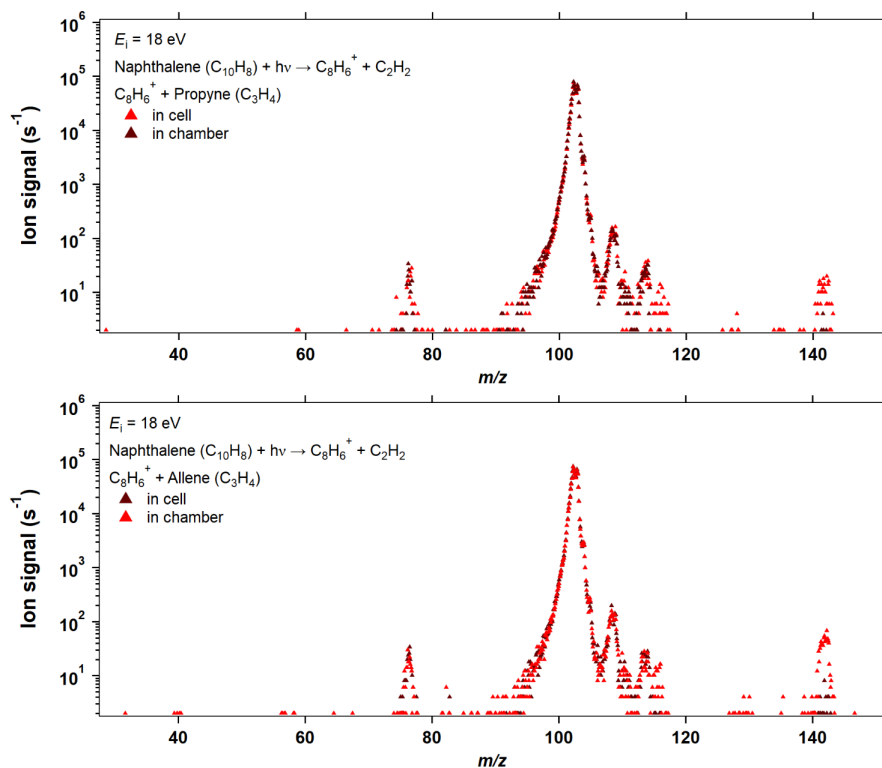

**Figure S2:** Mass spectra of  $C_8H_6^+$  generated by dissociative ionization of Naphthalene at a photon energy of 18 eV, reacting with Propyne (top panel) and Allene (bottom panel).

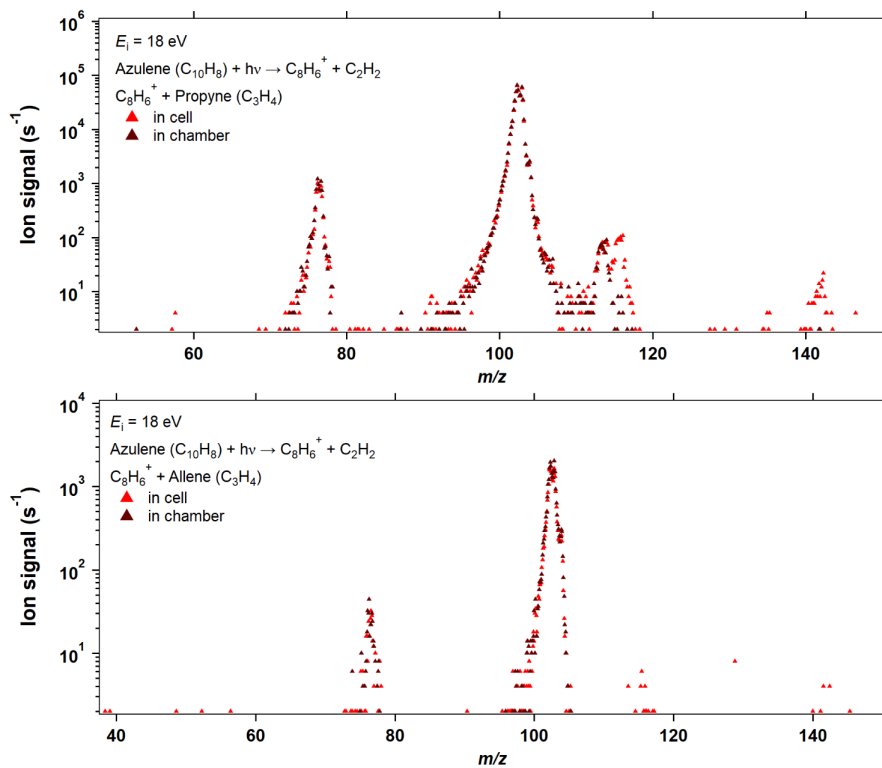

**Figure S3:** Mass spectra of  $C_8H_6^+$  generated by dissociative ionization of Azulene at a photon energy of 18 eV, reacting with Propyne (top panel) and Allene (bottom panel).

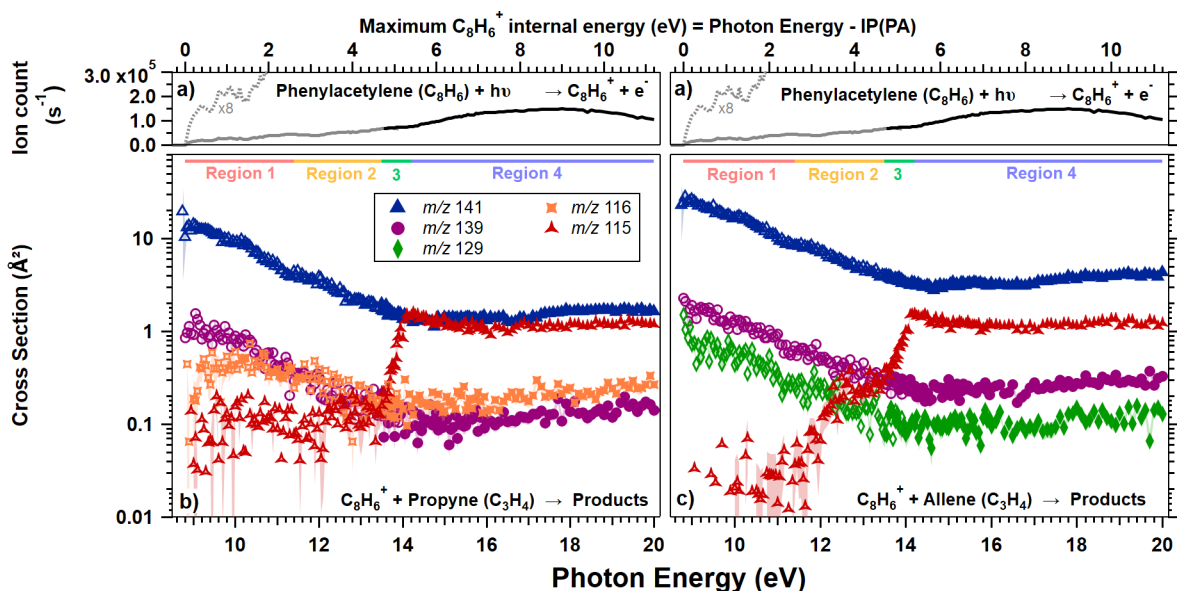

**Figure S4:** The top panels (black traces) display the  $C_8H_6^+$  photoion yield starting from phenylacetylene precursor (gray region was recorded with Kr in gas filter while dark region was recorded with Ne in gas filter). Bottom panels are reaction cross sections for the products resulting from  $C_8H_6^+$  produced from phenylacetylene reacting, from left to right, with propyne and allene as a function of photon energy. The error bars are given in shaded colors in bottom panels.

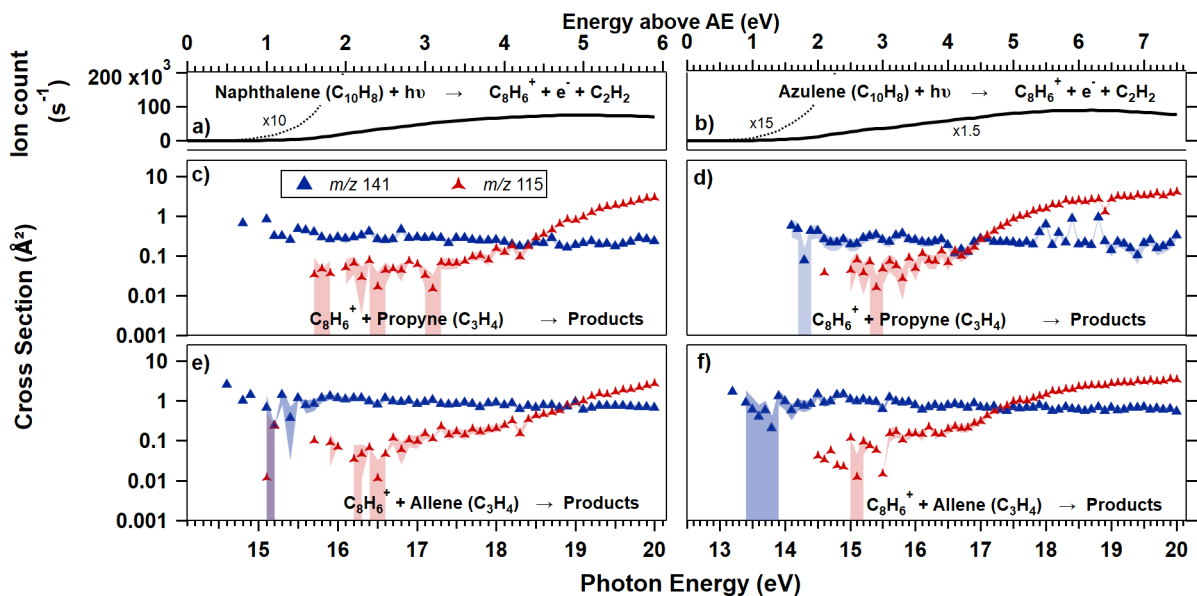

**Figure S5:** The top panels (black traces), a) and b), display the  $C_8H_6^+$  photoion yield starting from **Naph** and **Azu** precursors, respectively. Middle panels, c) and d), are reaction cross sections of  $C_8H_6^+$  with propyne as a function of photon energy starting with **Naph** and **Azu** as precursors, respectively. Bottom panels, e) and f), are the reaction cross sections with allene from **Naph** and from **Azu**, respectively. We defined the AE as the energy of the photon where more than 20  $C_8H_6^+$  ions/s are detected. The error bars are given in shaded colors in bottom panels.

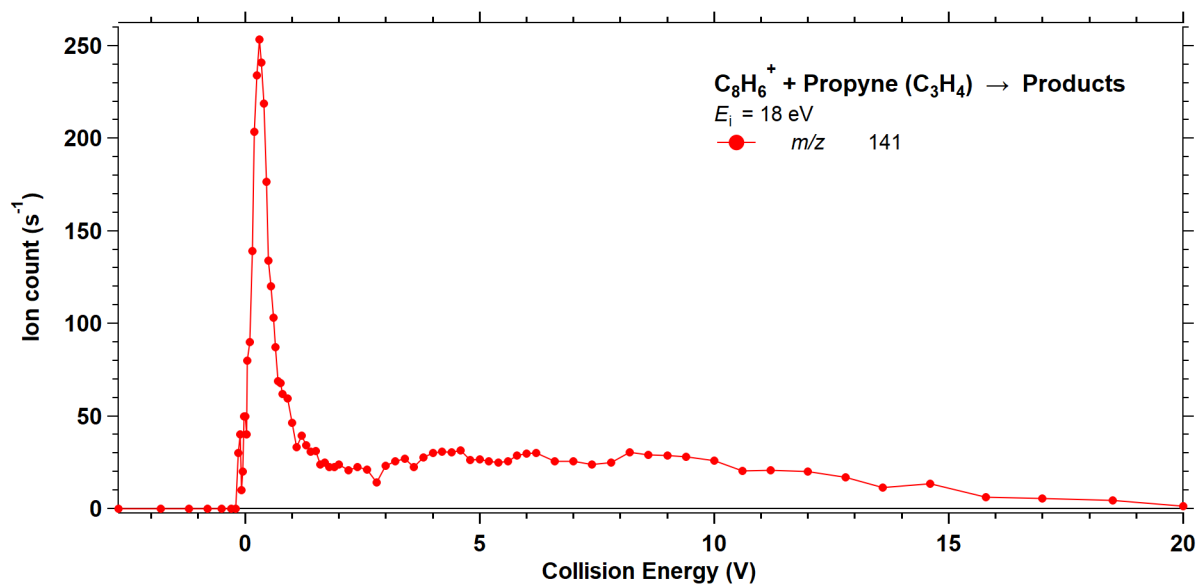

**Figure S6:** Reaction cross section of  $\text{C}_8\text{H}_6^+$ –generated from **PA** at photon energy of 18 eV–with propyne as a function collision energy.

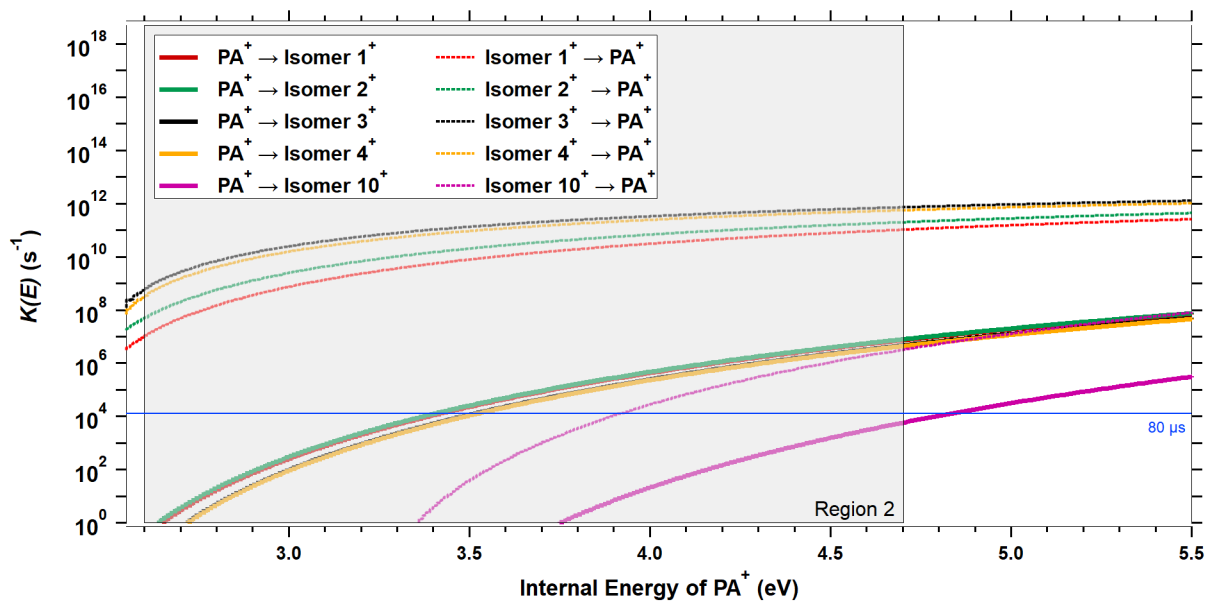

**Figure S7:** Microcanonical rate constants for interconversion from  $\text{PA}^+$  to  $1^+$ ,  $2^+$ ,  $3^+$ ,  $4^+$ , and  $10^+$  (solid lines) and the corresponding back reactions (dashed lines) as a function of the internal energy of  $\text{PA}^+$ . The shaded grey area represents the energies accessible in region 2.

## 4 Supplementary Tables

**Table S1:** Reaction products for  $C_8H_6^+$  from **PA** reacting with **Propyne** and **Allene**.

| Reactant       | Product       | $m/z$ | Mechanism                                        |
|----------------|---------------|-------|--------------------------------------------------|
| <b>Propyne</b> | $C_{11}H_9^+$ | 141   | Adduct formation followed by loss of H           |
| <b>Propyne</b> | $C_{11}H_7^+$ | 139   | Adduct formation followed by loss of H and $H_2$ |
| <b>Propyne</b> | $C_9H_8^+$    | 116   | Adduct formation followed by loss of $C_2H_2$    |
| <b>Propyne</b> | $C_9H_7^+$    | 115   | Adduct formation followed by loss of $CH_2CH$    |
| <b>Allene</b>  | $C_{11}H_9^+$ | 141   | Adduct formation followed by loss of H           |
| <b>Allene</b>  | $C_{11}H_7^+$ | 139   | Adduct formation followed by loss of H and $H_2$ |
| <b>Allene</b>  | $C_{10}H_9^+$ | 129   | Adduct formation followed by loss of CH          |
| <b>Allene</b>  | $C_9H_7^+$    | 115   | Adduct formation followed by loss of $CH_2CH$    |

**Table S2:** Reaction products for  $C_8H_6^+$  from **Naph** and **Azu** reacting with **Propyne** and **Allene**.

| Reactant       | Product       | $m/z$ | Mechanism                                     |
|----------------|---------------|-------|-----------------------------------------------|
| <b>Propyne</b> | $C_{11}H_9^+$ | 141   | Adduct formation followed by loss of H        |
| <b>Propyne</b> | $C_9H_7^+$    | 115   | Adduct formation followed by loss of $CH_2CH$ |
| <b>Allene</b>  | $C_{11}H_9^+$ | 141   | Adduct formation followed by loss of H        |
| <b>Allene</b>  | $C_9H_7^+$    | 115   | Adduct formation followed by loss of $CH_2CH$ |



**Table S3:** Reaction cross sections to form  $m/z$  115 from  $C_8H_6^+$  generated from **PA** reacting with allene. Kr in the gas filter.

| Energy/eV | Sigma/A <sup>2</sup> | Energy/eV | Sigma/A <sup>2</sup> | Energy/eV | Sigma/A <sup>2</sup> |
|-----------|----------------------|-----------|----------------------|-----------|----------------------|
| 8.700000  | 0.000000             | 10.450000 | 0.000000             | 12.200000 | 0.1446714            |
| 8.750000  | 0.000000             | 10.500000 | 0.0191286            | 12.250000 | 0.1612194            |
| 8.800000  | 0.000000             | 10.550000 | 0.0178393            | 12.300000 | 0.2567257            |
| 8.850000  | 0.000000             | 10.600000 | 0.0156125            | 12.350000 | 0.1787439            |
| 8.900000  | 0.000000             | 10.650000 | 0.0173836            | 12.400000 | 0.1113478            |
| 8.950000  | 0.000000             | 10.700000 | 0.000000             | 12.450000 | 0.1864153            |
| 9.000000  | 0.000000             | 10.750000 | 0.0297057            | 12.500000 | 0.3197050            |
| 9.050000  | 0.0335949            | 10.800000 | 0.0283938            | 12.550000 | 0.1991233            |
| 9.100000  | 0.000000             | 10.850000 | 0.0278642            | 12.600000 | 0.2705186            |
| 9.150000  | 0.000000             | 10.900000 | 0.0278315            | 12.650000 | 0.2690573            |
| 9.200000  | 0.000000             | 10.950000 | 0.0281211            | 12.700000 | 0.3775088            |
| 9.250000  | 0.000000             | 11.000000 | 0.0141332            | 12.750000 | 0.2295561            |
| 9.300000  | 0.000000             | 11.050000 | 0.0273999            | 12.800000 | 0.1780339            |
| 9.350000  | 0.000000             | 11.100000 | 0.0399555            | 12.850000 | 0.2078794            |
| 9.400000  | 0.000000             | 11.150000 | 0.0517331            | 12.900000 | 0.2450375            |
| 9.450000  | 0.0289384            | 11.200000 | 0.000000             | 12.950000 | 0.2233284            |
| 9.500000  | 0.000000             | 11.250000 | 0.0121998            | 13.000000 | 0.2095857            |
| 9.550000  | 0.0235289            | 11.300000 | 0.000000             | 13.050000 | 0.2346857            |
| 9.600000  | 0.000000             | 11.350000 | 0.0243578            | 13.100000 | 0.2513954            |
| 9.650000  | 0.000000             | 11.400000 | 0.0367975            | 13.150000 | 0.3669185            |
| 9.700000  | 0.0608640            | 11.450000 | 0.0623856            | 13.200000 | 0.2156623            |
| 9.750000  | 0.000000             | 11.500000 | 0.0378224            | 13.250000 | 0.2676259            |
| 9.800000  | 0.000000             | 11.550000 | 0.0387844            | 13.300000 | 0.3134666            |
| 9.850000  | 0.000000             | 11.600000 | 0.0258345            | 13.350000 | 0.2755503            |
| 9.900000  | 0.0188347            | 11.650000 | 0.0130752            | 13.400000 | 0.2329896            |
| 9.950000  | 0.000000             | 11.700000 | 0.0530903            | 13.450000 | 0.2898250            |
| 10.000000 | 0.0207782            | 11.750000 | 0.0820247            | 13.500000 | 0.3836992            |
| 10.050000 | 0.0241342            | 11.800000 | 0.0826616            | 13.550000 | 0.3917061            |
| 10.100000 | 0.0190817            | 11.850000 | 0.0822754            | 13.600000 | 0.3363986            |
| 10.150000 | 0.000000             | 11.900000 | 0.0682870            | 13.650000 | 0.4290393            |
| 10.200000 | 0.000000             | 11.950000 | 0.0409793            | 13.700000 | 0.4669811            |
| 10.250000 | 0.0460816            | 12.000000 | 0.0667713            | 13.750000 | 0.4303103            |
| 10.300000 | 0.0709973            | 12.050000 | 0.1187894            | 13.800000 | 0.5522698            |
| 10.350000 | 0.000000             | 12.100000 | 0.1302878            | 13.850000 | 0.6697499            |
| 10.400000 | 0.0189924            | 12.150000 | 0.1366482            | 13.900000 | 0.7528005            |

**Table S4:** Reaction cross sections to form  $m/z$  115 from  $C_8H_6^+$  generated from **PA** reacting with allene. Ne in the gas filter.

| Energy/eV  | Sigma/A <sup>2</sup> | Energy/eV  | Sigma/A <sup>2</sup> | Energy/eV  | Sigma/A <sup>2</sup> |
|------------|----------------------|------------|----------------------|------------|----------------------|
| 13.5500000 | 0.3232834            | 15.0500000 | 1.0502326            | 17.1000000 | 1.0176324            |
| 13.6000000 | 0.3557838            | 15.1000000 | 1.2941538            | 17.2000000 | 1.1652565            |
| 13.6500000 | 0.3707547            | 15.1500000 | 1.1742060            | 17.3000000 | 1.2076330            |
| 13.7000000 | 0.4556333            | 15.2000000 | 1.2122545            | 17.4000000 | 1.2100731            |
| 13.7500000 | 0.5556046            | 15.2500000 | 1.2970597            | 17.5000000 | 1.1765767            |
| 13.8000000 | 0.4982941            | 15.3000000 | 1.2521408            | 17.6000000 | 1.1268605            |
| 13.8500000 | 0.7019489            | 15.3500000 | 1.1952136            | 17.7000000 | 1.2304184            |
| 13.9000000 | 0.7805923            | 15.4000000 | 1.2047486            | 17.8000000 | 1.2252383            |
| 13.9500000 | 0.8671439            | 15.4500000 | 1.2853589            | 17.9000000 | 1.1596589            |
| 14.0000000 | 1.0088753            | 15.5000000 | 1.1929883            | 18.0000000 | 1.1597970            |
| 14.0500000 | 1.0396519            | 15.5500000 | 1.1716189            | 18.1000000 | 1.1403750            |
| 14.1000000 | 1.5100945            | 15.6000000 | 1.1720849            | 18.2000000 | 1.2934397            |
| 14.1500000 | 1.5455704            | 15.6500000 | 1.1563933            | 18.3000000 | 1.1984068            |
| 14.2000000 | 1.5690864            | 15.7000000 | 1.2180020            | 18.4000000 | 1.2537371            |
| 14.2500000 | 1.4675868            | 15.7500000 | 0.9929348            | 18.5000000 | 1.2388856            |
| 14.3000000 | 1.4739594            | 15.8000000 | 1.0882964            | 18.6000000 | 1.3235241            |
| 14.3500000 | 1.4284836            | 15.8500000 | 1.0623102            | 18.7000000 | 1.2383780            |
| 14.4000000 | 1.4602454            | 15.9000000 | 1.1666179            | 18.8000000 | 1.3657962            |
| 14.4500000 | 1.5419936            | 15.9500000 | 1.2068177            | 18.9000000 | 1.3679274            |
| 14.5000000 | 1.4600999            | 16.0000000 | 1.1469276            | 19.0000000 | 1.1272619            |
| 14.5500000 | 1.2675064            | 16.1000000 | 1.1946595            | 19.1000000 | 1.2147735            |
| 14.6000000 | 1.2061712            | 16.2000000 | 1.1489625            | 19.2000000 | 1.3303977            |
| 14.6500000 | 1.3169668            | 16.3000000 | 1.1261550            | 19.3000000 | 1.3259546            |
| 14.7000000 | 1.4078137            | 16.4000000 | 1.1798788            | 19.4000000 | 1.1808822            |
| 14.7500000 | 1.1662393            | 16.5000000 | 1.1596699            | 19.5000000 | 1.1739740            |
| 14.8000000 | 1.2862867            | 16.6000000 | 1.0246606            | 19.6000000 | 1.1544542            |
| 14.8500000 | 1.3884503            | 16.7000000 | 1.1784751            | 19.7000000 | 1.3249918            |
| 14.9000000 | 1.2152473            | 16.8000000 | 1.0111654            | 19.8000000 | 1.2795647            |
| 14.9500000 | 1.2263316            | 16.9000000 | 1.1728152            | 19.9000000 | 1.1370683            |
| 15.0000000 | 1.2153089            | 17.0000000 | 1.0810577            | 20.0000000 | 1.2249573            |

**Table S5:** Reaction cross sections to form  $m/z$  115 from  $C_8H_6^+$  generated from **Naph** reacting with allene.

| Energy/eV | Sigma/A <sup>2</sup> | Energy/eV | Sigma/A <sup>2</sup> | Energy/eV | Sigma/A <sup>2</sup> |
|-----------|----------------------|-----------|----------------------|-----------|----------------------|
| 12.500000 | 0.000000             | 15.100000 | 0.0117042            | 17.700000 | 0.1938995            |
| 12.600000 | 0.000000             | 15.200000 | 0.2412967            | 17.800000 | 0.1688577            |
| 12.700000 | 0.000000             | 15.300000 | 0.0000000            | 17.900000 | 0.1963217            |
| 12.800000 | 0.000000             | 15.400000 | 0.0000000            | 18.000000 | 0.2054619            |
| 12.900000 | 0.000000             | 15.500000 | 0.0000000            | 18.100000 | 0.2444474            |
| 13.000000 | 0.000000             | 15.600000 | 0.0000000            | 18.200000 | 0.3164135            |
| 13.100000 | NAN                  | 15.700000 | 0.1031534            | 18.300000 | 0.1537099            |
| 13.200000 | 0.000000             | 15.800000 | NAN                  | 18.400000 | 0.3442089            |
| 13.300000 | 0.000000             | 15.900000 | 0.0904572            | 18.500000 | 0.4349679            |
| 13.400000 | NAN                  | 16.000000 | 0.0710028            | 18.600000 | 0.4543165            |
| 13.500000 | 0.000000             | 16.100000 | NAN                  | 18.700000 | 0.5179300            |
| 13.600000 | 0.000000             | 16.200000 | 0.0342596            | 18.800000 | 0.5839139            |
| 13.700000 | 0.000000             | 16.300000 | 0.0459002            | 18.900000 | 0.7702425            |
| 13.800000 | 0.000000             | 16.400000 | 0.0684424            | 19.000000 | 0.9068183            |
| 13.900000 | 0.000000             | 16.500000 | 0.0115635            | 19.100000 | 0.9874797            |
| 14.000000 | 0.000000             | 16.600000 | 0.0459016            | 19.200000 | 1.3087095            |
| 14.100000 | NAN                  | 16.700000 | 0.1184502            | 19.300000 | 1.5174700            |
| 14.200000 | 0.000000             | 16.800000 | 0.0603995            | 19.400000 | 1.4379933            |
| 14.300000 | 0.000000             | 16.900000 | 0.1040801            | 19.500000 | 1.6533824            |
| 14.400000 | 0.000000             | 17.000000 | 0.0989635            | 19.600000 | 1.8857253            |
| 14.500000 | NAN                  | 17.100000 | 0.1528001            | 19.700000 | 1.9655797            |
| 14.600000 | 0.000000             | 17.200000 | 0.1114948            | 19.800000 | 2.1453702            |
| 14.700000 | 0.000000             | 17.300000 | 0.2301905            | 19.900000 | 2.4675455            |
| 14.800000 | 0.000000             | 17.400000 | 0.1418415            | 20.000000 | 2.6860280            |
| 14.900000 | 0.000000             | 17.500000 | 0.1713146            |           |                      |
| 15.000000 | NAN                  | 17.600000 | 0.1439517            |           |                      |

**Table S6:** Reaction cross sections to form  $m/z$  115 from  $C_8H_6^+$  generated from **Azu** reacting with allene.

| Energy/eV | Sigma/A <sup>2</sup> | Energy/eV | Sigma/A <sup>2</sup> | Energy/eV | Sigma/A <sup>2</sup> |
|-----------|----------------------|-----------|----------------------|-----------|----------------------|
| 12.000000 | 0.000000             | 14.700000 | 0.0568583            | 17.400000 | 0.7556168            |
| 12.100000 | 0.000000             | 14.800000 | 0.0241876            | 17.500000 | 0.9501532            |
| 12.200000 | 0.000000             | 14.900000 | 0.0225326            | 17.600000 | 1.0436096            |
| 12.300000 | 0.000000             | 15.000000 | 0.1172010            | 17.700000 | 1.0108134            |
| 12.400000 | 0.000000             | 15.100000 | 0.0121369            | 17.800000 | 1.1789734            |
| 12.500000 | 0.000000             | 15.200000 | 0.0928325            | 17.900000 | 1.3189744            |
| 12.600000 | 0.000000             | 15.300000 | 0.0763540            | 18.000000 | 1.4496131            |
| 12.700000 | 0.000000             | 15.400000 | 0.0583136            | 18.100000 | 1.7189652            |
| 12.800000 | NAN                  | 15.500000 | 0.0146244            | 18.200000 | 1.7337790            |
| 12.900000 | 0.000000             | 15.600000 | 0.1512502            | 18.300000 | 1.9512336            |
| 13.000000 | 0.000000             | 15.700000 | 0.1731345            | 18.400000 | 1.9319919            |
| 13.100000 | 0.000000             | 15.800000 | 0.1061001            | 18.500000 | 2.2615030            |
| 13.200000 | 0.000000             | 15.900000 | 0.1533903            | 18.600000 | 2.3335321            |
| 13.300000 | 0.000000             | 16.000000 | 0.1499277            | 18.700000 | 2.4583378            |
| 13.400000 | 0.000000             | 16.100000 | 0.1447004            | 18.800000 | 2.4346204            |
| 13.500000 | 0.000000             | 16.200000 | 0.2222510            | 18.900000 | 2.4225318            |
| 13.600000 | 0.000000             | 16.300000 | 0.1530709            | 19.000000 | 2.7380869            |
| 13.700000 | 0.000000             | 16.400000 | 0.1448781            | 19.100000 | 2.7895994            |
| 13.800000 | 0.000000             | 16.500000 | 0.1959212            | 19.200000 | 2.9195783            |
| 13.900000 | 0.000000             | 16.600000 | 0.2264925            | 19.300000 | 2.8497479            |
| 14.000000 | 0.000000             | 16.700000 | 0.2030744            | 19.400000 | 3.1516025            |
| 14.100000 | 0.000000             | 16.800000 | 0.2101669            | 19.500000 | 3.0869572            |
| 14.200000 | 0.000000             | 16.900000 | 0.2759400            | 19.600000 | 3.3262012            |
| 14.300000 | 0.000000             | 17.000000 | 0.3023333            | 19.700000 | 2.9884281            |
| 14.400000 | 0.000000             | 17.100000 | 0.4367716            | 19.800000 | 3.1845527            |
| 14.500000 | 0.0416282            | 17.200000 | 0.5565684            | 19.900000 | 3.4861164            |
| 14.600000 | 0.0331674            | 17.300000 | 0.6479917            | 20.000000 | 3.3505578            |

**Table S7:** Equilibrium structure of  $\text{PA}^+$  optimized at the  $\omega\text{B97X-D/aug-cc-pVTZ}$  level of theory

Standard orientation:

| Center<br>Number | Atomic<br>Number | Atomic<br>Type | Coordinates (Angstroms) |           |           |
|------------------|------------------|----------------|-------------------------|-----------|-----------|
|                  |                  |                | X                       | Y         | Z         |
| 1                | 6                | 0              | -2.168934               | -0.000000 | -0.000000 |
| 2                | 6                | 0              | -1.484141               | -1.229282 | -0.000001 |
| 3                | 6                | 0              | -0.121403               | -1.240700 | -0.000000 |
| 4                | 6                | 0              | 0.590039                | 0.000000  | -0.000000 |
| 5                | 6                | 0              | -0.121404               | 1.240700  | 0.000000  |
| 6                | 6                | 0              | -1.484142               | 1.229282  | -0.000000 |
| 7                | 1                | 0              | -3.250883               | -0.000000 | -0.000000 |
| 8                | 1                | 0              | -2.042016               | -2.153987 | -0.000001 |
| 9                | 1                | 0              | 0.438203                | -2.164808 | -0.000000 |
| 10               | 1                | 0              | 0.438203                | 2.164808  | 0.000000  |
| 11               | 1                | 0              | -2.042016               | 2.153987  | 0.000000  |
| 12               | 6                | 0              | 1.971730                | 0.000000  | 0.000000  |
| 13               | 6                | 0              | 3.185682                | 0.000000  | 0.000001  |
| 14               | 1                | 0              | 4.253951                | -0.000003 | 0.000001  |

**Table S8:** Equilibrium structure of  $\text{PE}^+$  optimized at the  $\omega\text{B97X-D/aug-cc-pVTZ}$  level of theory

Standard orientation:

| Center<br>Number | Atomic<br>Number | Atomic<br>Type | Coordinates (Angstroms) |           |           |
|------------------|------------------|----------------|-------------------------|-----------|-----------|
|                  |                  |                | X                       | Y         | Z         |
| 1                | 6                | 0              | -1.325076               | -1.157995 | -0.000002 |
| 2                | 6                | 0              | -2.140152               | -0.000002 | 0.000002  |
| 3                | 6                | 0              | -1.325084               | 1.157991  | 0.000002  |
| 4                | 6                | 0              | -0.000001               | 0.732143  | -0.000002 |
| 5                | 6                | 0              | 1.325084                | -1.157991 | -0.000001 |
| 6                | 6                | 0              | 0.000001                | -0.732143 | -0.000004 |
| 7                | 1                | 0              | -1.688788               | -2.174457 | -0.000002 |
| 8                | 1                | 0              | -3.218573               | -0.000005 | 0.000005  |
| 9                | 1                | 0              | -1.688799               | 2.174451  | 0.000005  |
| 10               | 1                | 0              | 3.218573                | 0.000005  | 0.000004  |
| 11               | 6                | 0              | 2.140152                | 0.000002  | 0.000002  |
| 12               | 6                | 0              | 1.325076                | 1.157996  | 0.000001  |
| 13               | 1                | 0              | 1.688788                | 2.174457  | 0.000003  |
| 14               | 1                | 0              | 1.688799                | -2.174452 | -0.000000 |

**Table S9:** Equilibrium structure of  $\text{BCB}^+$  optimized at the  $\omega\text{B97X-D/aug-cc-pVTZ}$  level of theory

Standard orientation:

| Center Number | Atomic Number | Atomic Type | Coordinates (Angstroms) |           |           |
|---------------|---------------|-------------|-------------------------|-----------|-----------|
|               |               |             | X                       | Y         | Z         |
| 1             | 6             | 0           | 0.000000                | 1.467091  | -0.620258 |
| 2             | 6             | 0           | -0.000000               | 0.719644  | 0.524720  |
| 3             | 6             | 0           | 0.000000                | -0.719644 | 0.524720  |
| 4             | 6             | 0           | -0.000000               | -1.467091 | -0.620258 |
| 5             | 6             | 0           | -0.000000               | -0.704062 | -1.793990 |
| 6             | 6             | 0           | 0.000000                | 0.704062  | -1.793990 |
| 7             | 1             | 0           | -0.000000               | 2.546289  | -0.641616 |
| 8             | 1             | 0           | 0.000000                | -2.546289 | -0.641616 |
| 9             | 1             | 0           | -0.000000               | -1.209759 | -2.749778 |
| 10            | 1             | 0           | 0.000000                | 1.209759  | -2.749778 |
| 11            | 6             | 0           | 0.000000                | -0.688207 | 1.992964  |
| 12            | 1             | 0           | 0.000001                | -1.436973 | 2.770781  |
| 13            | 6             | 0           | -0.000000               | 0.688207  | 1.992964  |
| 14            | 1             | 0           | -0.000001               | 1.436973  | 2.770781  |

**Table S10:** Equilibrium structure of  $\mathbf{1}^+$  optimized at the  $\omega\text{B97X-D/aug-cc-pVTZ}$  level of theory

Standard orientation:

| Center Number | Atomic Number | Atomic Type | Coordinates (Angstroms) |           |           |
|---------------|---------------|-------------|-------------------------|-----------|-----------|
|               |               |             | X                       | Y         | Z         |
| 1             | 6             | 0           | -2.253279               | -0.131617 | -0.000001 |
| 2             | 6             | 0           | -1.506464               | 1.146990  | -0.000001 |
| 3             | 6             | 0           | -0.157067               | 1.181431  | 0.000001  |
| 4             | 6             | 0           | 0.599682                | -0.028771 | 0.000003  |
| 5             | 6             | 0           | -0.041933               | -1.303087 | 0.000000  |
| 6             | 6             | 0           | -1.377131               | -1.279928 | -0.000001 |
| 7             | 1             | 0           | -2.937626               | -0.168226 | 0.860788  |
| 8             | 1             | 0           | -2.082409               | 2.063417  | -0.000001 |
| 9             | 1             | 0           | 0.376617                | 2.120158  | 0.000000  |
| 10            | 1             | 0           | 0.545604                | -2.210549 | -0.000000 |
| 11            | 1             | 0           | -2.937625               | -0.168226 | -0.860791 |
| 12            | 6             | 0           | 1.999138                | 0.035007  | 0.000001  |
| 13            | 6             | 0           | 3.198781                | 0.085372  | -0.000001 |
| 14            | 1             | 0           | 4.265089                | 0.131050  | -0.000003 |

**Table S11:** Equilibrium structure of  $2^+$  optimized at the  $\omega$ B97X-D/aug-cc-pVTZ level of theory

Standard orientation:

| Center<br>Number | Atomic<br>Number | Atomic<br>Type | Coordinates (Angstroms) |           |           |
|------------------|------------------|----------------|-------------------------|-----------|-----------|
|                  |                  |                | X                       | Y         | Z         |
| 1                | 6                | 0              | 2.292655                | -0.095934 | -0.000001 |
| 2                | 6                | 0              | 1.537642                | -1.200080 | -0.000001 |
| 3                | 6                | 0              | 0.096051                | -1.289870 | 0.000000  |
| 4                | 6                | 0              | -0.581679               | 0.042024  | 0.000002  |
| 5                | 6                | 0              | 0.177951                | 1.192543  | 0.000002  |
| 6                | 6                | 0              | 1.570120                | 1.122071  | 0.000001  |
| 7                | 1                | 0              | 3.373364                | -0.105477 | -0.000003 |
| 8                | 1                | 0              | -0.252212               | -1.878705 | -0.860947 |
| 9                | 1                | 0              | -0.308632               | 2.156457  | 0.000001  |
| 10               | 1                | 0              | 2.130357                | 2.049996  | -0.000001 |
| 11               | 6                | 0              | -1.983151               | 0.073911  | 0.000001  |
| 12               | 6                | 0              | -3.183065               | 0.081889  | -0.000002 |
| 13               | 1                | 0              | -4.249810               | 0.097104  | -0.000007 |
| 14               | 1                | 0              | -0.252211               | -1.878706 | 0.860948  |

**Table S12:** Equilibrium structure of  $3^+$  optimized at the  $\omega$ B97X-D/aug-cc-pVTZ level of theory

Standard orientation:

| Center<br>Number | Atomic<br>Number | Atomic<br>Type | Coordinates (Angstroms) |           |           |
|------------------|------------------|----------------|-------------------------|-----------|-----------|
|                  |                  |                | X                       | Y         | Z         |
| 1                | 6                | 0              | -2.200619               | 0.096162  | -0.000009 |
| 2                | 6                | 0              | -1.549075               | -1.225458 | 0.000087  |
| 3                | 6                | 0              | -0.111514               | -1.163378 | 0.000066  |
| 4                | 6                | 0              | 0.674674                | -0.058158 | 0.000002  |
| 5                | 6                | 0              | -0.052717               | 1.159601  | -0.000075 |
| 6                | 6                | 0              | -1.456220               | 1.232795  | -0.000082 |
| 7                | 1                | 0              | -3.282467               | 0.128450  | -0.000011 |
| 8                | 1                | 0              | -1.905476               | -1.821197 | -0.856550 |
| 9                | 1                | 0              | -1.905421               | -1.821002 | 0.856889  |
| 10               | 1                | 0              | 0.519951                | 2.080643  | -0.000137 |
| 11               | 1                | 0              | -1.929196               | 2.203777  | -0.000149 |
| 12               | 6                | 0              | 2.095771                | -0.079388 | 0.000002  |
| 13               | 6                | 0              | 3.290754                | -0.077129 | 0.000003  |
| 14               | 1                | 0              | 4.356295                | -0.080955 | 0.000001  |

**Table S13:** Equilibrium structure of  $4^+$  optimized at the  $\omega$ B97X-D/aug-cc-pVTZ level of theory

Standard orientation:

| Center<br>Number | Atomic<br>Number | Atomic<br>Type | Coordinates (Angstroms) |           |           |
|------------------|------------------|----------------|-------------------------|-----------|-----------|
|                  |                  |                | X                       | Y         | Z         |
| 1                | 6                | 0              | -2.189376               | 0.135558  | 0.000004  |
| 2                | 6                | 0              | -1.617209               | -1.184932 | 0.000005  |
| 3                | 6                | 0              | -0.144473               | -1.192576 | -0.000001 |
| 4                | 6                | 0              | 0.573581                | -0.027866 | -0.000003 |
| 5                | 6                | 0              | -0.128949               | 1.207204  | -0.000003 |
| 6                | 6                | 0              | -1.528902               | 1.307556  | 0.000001  |
| 7                | 1                | 0              | -1.996509               | -1.766596 | 0.856422  |
| 8                | 1                | 0              | -1.996521               | -1.766610 | -0.856396 |
| 9                | 1                | 0              | 0.359874                | -2.150220 | -0.000002 |
| 10               | 1                | 0              | 0.458369                | 2.118663  | -0.000003 |
| 11               | 1                | 0              | -2.019018               | 2.271135  | 0.000003  |
| 12               | 6                | 0              | 1.998026                | -0.023100 | -0.000003 |
| 13               | 6                | 0              | 3.193169                | -0.006928 | -0.000003 |
| 14               | 1                | 0              | 4.258613                | 0.004135  | 0.000004  |

**Table S14:** Equilibrium structure of  $5^+$  optimized at the  $\omega$ B97X-D/aug-cc-pVTZ level of theory

Standard orientation:

| Center<br>Number | Atomic<br>Number | Atomic<br>Type | Coordinates (Angstroms) |           |           |
|------------------|------------------|----------------|-------------------------|-----------|-----------|
|                  |                  |                | X                       | Y         | Z         |
| 1                | 6                | 0              | -1.865002               | 0.284105  | 0.000006  |
| 2                | 6                | 0              | -0.527459               | 0.830039  | -0.000000 |
| 3                | 6                | 0              | -0.172413               | 2.119038  | -0.000004 |
| 4                | 6                | 0              | 0.364228                | -0.336595 | 0.000005  |
| 5                | 6                | 0              | -0.450074               | -1.489538 | -0.000002 |
| 6                | 6                | 0              | -1.791074               | -1.104350 | -0.000000 |
| 7                | 1                | 0              | -2.769656               | 0.873749  | 0.000006  |
| 8                | 1                | 0              | 0.869275                | 2.413583  | -0.000003 |
| 9                | 1                | 0              | -0.077374               | -2.502166 | -0.000007 |
| 10               | 1                | 0              | -2.633344               | -1.777633 | -0.000003 |
| 11               | 6                | 0              | 1.742996                | -0.306671 | 0.000001  |
| 12               | 6                | 0              | 2.950476                | -0.272522 | -0.000003 |
| 13               | 1                | 0              | 4.017603                | -0.252837 | -0.000005 |
| 14               | 1                | 0              | -0.916581               | 2.904258  | -0.000003 |



**Table S15:** Equilibrium structure of  $6^+$  optimized at the  $\omega$ B97X-D/aug-cc-pVTZ level of theory

Standard orientation:

| Center<br>Number | Atomic<br>Number | Atomic<br>Type | Coordinates (Angstroms) |           |           |
|------------------|------------------|----------------|-------------------------|-----------|-----------|
|                  |                  |                | X                       | Y         | Z         |
| 1                | 6                | 0              | -1.218024               | 1.196274  | -0.000005 |
| 2                | 6                | 0              | -1.531176               | -0.231450 | -0.000002 |
| 3                | 6                | 0              | -2.738779               | -0.813494 | -0.000007 |
| 4                | 6                | 0              | -0.260188               | -0.903429 | 0.000005  |
| 5                | 6                | 0              | 0.759878                | 0.083384  | 0.000002  |
| 6                | 6                | 0              | 0.142799                | 1.363621  | -0.000004 |
| 7                | 1                | 0              | -1.954683               | 1.985744  | -0.000008 |
| 8                | 1                | 0              | -2.841655               | -1.890575 | -0.000007 |
| 9                | 1                | 0              | -0.098197               | -1.971016 | 0.000011  |
| 10               | 1                | 0              | 0.675023                | 2.300926  | -0.000006 |
| 11               | 6                | 0              | 2.126786                | -0.189826 | 0.000006  |
| 12               | 6                | 0              | 3.304726                | -0.431223 | 0.000007  |
| 13               | 1                | 0              | 4.350404                | -0.642935 | 0.000011  |
| 14               | 1                | 0              | -3.647030               | -0.225288 | -0.000016 |

**Table S16:** Equilibrium structure of  $7^+$  optimized at the  $\omega$ B97X-D/aug-cc-pVTZ level of theory

Standard orientation:

| Center<br>Number | Atomic<br>Number | Atomic<br>Type | Coordinates (Angstroms) |           |           |
|------------------|------------------|----------------|-------------------------|-----------|-----------|
|                  |                  |                | X                       | Y         | Z         |
| 1                | 6                | 0              | -2.197601               | 0.130877  | -0.255397 |
| 2                | 6                | 0              | -1.441002               | 1.278868  | -0.117728 |
| 3                | 6                | 0              | -0.126896               | 1.324138  | 0.138520  |
| 4                | 6                | 0              | 0.558900                | 0.028592  | 0.383886  |
| 5                | 6                | 0              | -0.248984               | -1.183845 | 0.172454  |
| 6                | 6                | 0              | -1.586866               | -1.125232 | -0.085148 |
| 7                | 1                | 0              | -3.253118               | 0.190207  | -0.497026 |
| 8                | 1                | 0              | 0.447967                | 2.237426  | 0.230919  |
| 9                | 1                | 0              | 0.258400                | -2.133580 | 0.281383  |
| 10               | 1                | 0              | -2.171479               | -2.027484 | -0.191877 |
| 11               | 6                | 0              | 1.954895                | -0.045974 | -0.008296 |
| 12               | 6                | 0              | 3.098012                | -0.101272 | -0.343856 |
| 13               | 1                | 0              | 4.119822                | -0.151985 | -0.641754 |
| 14               | 1                | 0              | 0.535659                | 0.048508  | 1.511749  |

**Table S17:** Equilibrium structure of  $\mathbf{8}^+$  optimized at the  $\omega$ B97X-D/aug-cc-pVTZ level of theory

Standard orientation:

| Center<br>Number | Atomic<br>Number | Atomic<br>Type | Coordinates (Angstroms) |           |           |
|------------------|------------------|----------------|-------------------------|-----------|-----------|
|                  |                  |                | X                       | Y         | Z         |
| 1                | 6                | 0              | -2.129185               | -0.029165 | -0.257780 |
| 2                | 6                | 0              | -1.451136               | 1.198274  | -0.129084 |
| 3                | 6                | 0              | -0.127886               | 1.218273  | 0.173131  |
| 4                | 6                | 0              | 0.614260                | -0.041030 | 0.450253  |
| 5                | 6                | 0              | -0.190053               | -1.225300 | 0.206531  |
| 6                | 6                | 0              | -1.502615               | -1.276354 | -0.079787 |
| 7                | 1                | 0              | -3.183229               | -0.014793 | -0.511571 |
| 8                | 1                | 0              | -2.048302               | -2.202172 | -0.198225 |
| 9                | 6                | 0              | 1.997247                | -0.075790 | -0.002319 |
| 10               | 6                | 0              | 3.127237                | -0.088211 | -0.381108 |
| 11               | 1                | 0              | 4.138057                | -0.104415 | -0.717425 |
| 12               | 1                | 0              | 0.427061                | 2.143055  | 0.267457  |
| 13               | 1                | 0              | -1.990372               | 2.119838  | -0.291955 |
| 14               | 1                | 0              | 0.629577                | -0.025696 | 1.572693  |

**Table S18:** Equilibrium structure of  $\mathbf{9}^+$  optimized at the  $\omega$ B97X-D/aug-cc-pVTZ level of theory

Standard orientation:

| Center<br>Number | Atomic<br>Number | Atomic<br>Type | Coordinates (Angstroms) |           |           |
|------------------|------------------|----------------|-------------------------|-----------|-----------|
|                  |                  |                | X                       | Y         | Z         |
| 1                | 6                | 0              | -1.535592               | -0.600989 | 0.512383  |
| 2                | 6                | 0              | -1.543708               | 0.644934  | -0.088238 |
| 3                | 6                | 0              | -1.679652               | 1.712170  | -0.635571 |
| 4                | 6                | 0              | 1.535591                | -0.600993 | -0.512382 |
| 5                | 6                | 0              | 0.619942                | -1.626458 | -0.322484 |
| 6                | 6                | 0              | -0.619947               | -1.626457 | 0.322484  |
| 7                | 1                | 0              | -2.409536               | -0.832982 | 1.112529  |
| 8                | 1                | 0              | -1.790336               | 2.654738  | -1.122759 |
| 9                | 1                | 0              | 0.959212                | -2.599656 | -0.658418 |
| 10               | 1                | 0              | -0.959219               | -2.599654 | 0.658417  |
| 11               | 6                | 0              | 1.543709                | 0.644930  | 0.088238  |
| 12               | 6                | 0              | 1.679657                | 1.712166  | 0.635570  |
| 13               | 1                | 0              | 1.790345                | 2.654734  | 1.122758  |
| 14               | 1                | 0              | 2.409534                | -0.832988 | -1.112528 |

**Table S19:** Equilibrium structure of  $10^+$  optimized at the  $\omega$ B97X-D/aug-cc-pVTZ level of theory

Standard orientation:

| Center<br>Number | Atomic<br>Number | Atomic<br>Type | Coordinates (Angstroms) |           |           |
|------------------|------------------|----------------|-------------------------|-----------|-----------|
|                  |                  |                | X                       | Y         | Z         |
| 1                | 6                | 0              | 2.221530                | -0.038795 | -0.000003 |
| 2                | 6                | 0              | 1.558148                | -1.274916 | -0.000001 |
| 3                | 6                | 0              | 0.207585                | -1.215142 | 0.000003  |
| 4                | 6                | 0              | -0.552878               | -0.030026 | 0.000002  |
| 5                | 6                | 0              | 0.168812                | 1.209424  | -0.000001 |
| 6                | 6                | 0              | 1.536272                | 1.183754  | -0.000003 |
| 7                | 1                | 0              | 3.304448                | -0.032633 | -0.000003 |
| 8                | 1                | 0              | 2.106511                | -2.206201 | -0.000000 |
| 9                | 1                | 0              | -0.384250               | 2.138697  | -0.000002 |
| 10               | 1                | 0              | 2.096802                | 2.106662  | -0.000003 |
| 11               | 6                | 0              | -1.904263               | -0.058298 | 0.000003  |
| 12               | 6                | 0              | -3.178364               | -0.079883 | 0.000001  |
| 13               | 1                | 0              | -3.732281               | -0.091630 | -0.934636 |
| 14               | 1                | 0              | -3.732284               | -0.091611 | 0.934637  |

**Table S20:** Equilibrium structure of  $11^+$  optimized at the  $\omega$ B97X-D/aug-cc-pVTZ level of theory

Standard orientation:

| Center<br>Number | Atomic<br>Number | Atomic<br>Type | Coordinates (Angstroms) |           |           |
|------------------|------------------|----------------|-------------------------|-----------|-----------|
|                  |                  |                | X                       | Y         | Z         |
| 1                | 6                | 0              | 0.573101                | 1.563949  | -0.200966 |
| 2                | 6                | 0              | -0.652045               | 1.228572  | 0.234533  |
| 3                | 6                | 0              | -1.746314               | 0.579901  | 0.487251  |
| 4                | 6                | 0              | 0.573098                | -1.563950 | 0.200966  |
| 5                | 6                | 0              | 1.672265                | -0.684805 | 0.123545  |
| 6                | 6                | 0              | 1.672267                | 0.684802  | -0.123544 |
| 7                | 1                | 0              | 0.729343                | 2.547098  | -0.630384 |
| 8                | 1                | 0              | -2.453392               | 0.715017  | 1.292796  |
| 9                | 1                | 0              | 2.642025                | -1.130291 | 0.309195  |
| 10               | 1                | 0              | 2.642028                | 1.130286  | -0.309193 |
| 11               | 6                | 0              | -0.652047               | -1.228570 | -0.234535 |
| 12               | 6                | 0              | -1.746316               | -0.579899 | -0.487250 |
| 13               | 1                | 0              | -2.453397               | -0.715014 | -1.292792 |
| 14               | 1                | 0              | 0.729337                | -2.547098 | 0.630384  |

**Table S21:** Equilibrium structure of  $\mathbf{12}^+$  optimized at the  $\omega$ B97X-D/aug-cc-pVTZ level of theory

Standard orientation:

| Center<br>Number | Atomic<br>Number | Atomic<br>Type | Coordinates (Angstroms) |           |           |
|------------------|------------------|----------------|-------------------------|-----------|-----------|
|                  |                  |                | X                       | Y         | Z         |
| 1                | 6                | 0              | 2.061395                | -0.018089 | -0.000002 |
| 2                | 6                | 0              | 1.361461                | 1.194368  | 0.000006  |
| 3                | 6                | 0              | -0.009078               | 1.199274  | 0.000008  |
| 4                | 6                | 0              | -0.719348               | -0.040155 | 0.000002  |
| 5                | 6                | 0              | 0.057297                | -1.206577 | -0.000007 |
| 6                | 6                | 0              | 1.410193                | -1.259298 | -0.000009 |
| 7                | 1                | 0              | 3.144123                | -0.000023 | -0.000005 |
| 8                | 1                | 0              | 1.909134                | 2.125018  | 0.000010  |
| 9                | 1                | 0              | -0.571109               | 2.124544  | 0.000014  |
| 10               | 1                | 0              | -2.539165               | -0.106344 | -1.639382 |
| 11               | 6                | 0              | -2.195083               | -0.088956 | -0.623073 |
| 12               | 6                | 0              | -2.195082               | -0.088963 | 0.623075  |
| 13               | 1                | 0              | -2.539165               | -0.106368 | 1.639383  |
| 14               | 1                | 0              | 1.965648                | -2.186446 | -0.000016 |

**Table S22:** Equilibrium structure of  $\mathbf{13}^+$  optimized at the  $\omega$ B97X-D/aug-cc-pVTZ level of theory

Standard orientation:

| Center<br>Number | Atomic<br>Number | Atomic<br>Type | Coordinates (Angstroms) |           |           |
|------------------|------------------|----------------|-------------------------|-----------|-----------|
|                  |                  |                | X                       | Y         | Z         |
| 1                | 6                | 0              | 1.899726                | -0.719507 | 0.000001  |
| 2                | 6                | 0              | 0.757832                | -1.481958 | -0.000000 |
| 3                | 6                | 0              | -0.392522               | -0.693671 | -0.000001 |
| 4                | 6                | 0              | -0.392522               | 0.693670  | -0.000001 |
| 5                | 6                | 0              | 0.757832                | 1.481958  | -0.000000 |
| 6                | 6                | 0              | 1.899726                | 0.719507  | 0.000001  |
| 7                | 1                | 0              | 2.863138                | -1.211597 | 0.000001  |
| 8                | 1                | 0              | 0.766817                | -2.560573 | 0.000000  |
| 9                | 1                | 0              | 0.766817                | 2.560573  | -0.000001 |
| 10               | 1                | 0              | 2.863138                | 1.211598  | 0.000001  |
| 11               | 6                | 0              | -1.588034               | -0.000000 | -0.000000 |
| 12               | 6                | 0              | -2.978947               | 0.000000  | 0.000001  |
| 13               | 1                | 0              | -3.519223               | -0.935133 | 0.000002  |
| 14               | 1                | 0              | -3.519223               | 0.935133  | 0.000001  |

**Table S23:** Equilibrium structure of  $\mathbf{14}^+$  optimized at the  $\omega$ B97X-D/aug-cc-pVTZ level of theory

Standard orientation:

| Center<br>Number | Atomic<br>Number | Atomic<br>Type | Coordinates (Angstroms) |           |           |
|------------------|------------------|----------------|-------------------------|-----------|-----------|
|                  |                  |                | X                       | Y         | Z         |
| 1                | 6                | 0              | -2.422216               | 0.692452  | -0.000001 |
| 2                | 6                | 0              | -2.422219               | -0.692447 | -0.000000 |
| 3                | 6                | 0              | -1.085983               | -1.147197 | 0.000000  |
| 4                | 6                | 0              | -0.219480               | -0.000002 | -0.000000 |
| 5                | 6                | 0              | -1.085978               | 1.147197  | -0.000001 |
| 6                | 1                | 0              | -3.293329               | 1.327917  | -0.000001 |
| 7                | 1                | 0              | -0.758627               | -2.175656 | 0.000000  |
| 8                | 1                | 0              | -0.758618               | 2.175654  | -0.000001 |
| 9                | 6                | 0              | 1.121524                | -0.000005 | -0.000000 |
| 10               | 6                | 0              | 2.370017                | -0.000004 | 0.000000  |
| 11               | 1                | 0              | -3.293335               | -1.327907 | -0.000001 |
| 12               | 6                | 0              | 3.682423                | 0.000003  | 0.000001  |
| 13               | 1                | 0              | 4.237686                | 0.930486  | 0.000001  |
| 14               | 1                | 0              | 4.237697                | -0.930473 | 0.000001  |

**Table S24:** Equilibrium structure of **PA-1<sup>+</sup>** optimized at the  $\omega$ B97X-D/aug-cc-pVTZ level of theory

Standard orientation:

| Center<br>Number | Atomic<br>Number | Atomic<br>Type | Coordinates (Angstroms) |           |           |
|------------------|------------------|----------------|-------------------------|-----------|-----------|
|                  |                  |                | X                       | Y         | Z         |
| 1                | 6                | 0              | 2.237301                | -0.077434 | -0.056084 |
| 2                | 6                | 0              | 1.533041                | 1.159886  | -0.004478 |
| 3                | 6                | 0              | 0.169158                | 1.160515  | 0.001940  |
| 4                | 6                | 0              | -0.595105               | -0.043204 | -0.012797 |
| 5                | 6                | 0              | 0.053884                | -1.271564 | -0.028890 |
| 6                | 6                | 0              | 1.439086                | -1.232281 | -0.062097 |
| 7                | 1                | 0              | 3.314319                | -0.136048 | -0.152322 |
| 8                | 1                | 0              | 2.096872                | 2.081373  | 0.010899  |
| 9                | 1                | 0              | -0.365845               | 2.099600  | 0.021636  |
| 10               | 1                | 0              | -0.492914               | -2.203486 | -0.023444 |
| 11               | 1                | 0              | 1.984295                | -0.811448 | 1.034943  |
| 12               | 6                | 0              | -2.010079               | 0.022996  | 0.000218  |
| 13               | 6                | 0              | -3.205135               | 0.085921  | 0.010471  |
| 14               | 1                | 0              | -4.269641               | 0.140991  | 0.018591  |

**Table S25:** Equilibrium structure of **PA-2<sup>+</sup>** optimized at the  $\omega$ B97X-D/aug-cc-pVTZ level of theory

Standard orientation:

| Center Number | Atomic Number | Atomic Type | Coordinates (Angstroms) |           |           |
|---------------|---------------|-------------|-------------------------|-----------|-----------|
|               |               |             | X                       | Y         | Z         |
| 1             | 6             | 0           | -2.274581               | -0.079345 | -0.025554 |
| 2             | 6             | 0           | -1.476566               | -1.216659 | -0.063317 |
| 3             | 6             | 0           | -0.074144               | -1.240522 | -0.063257 |
| 4             | 6             | 0           | 0.595610                | 0.027442  | -0.008669 |
| 5             | 6             | 0           | -0.185265               | 1.167795  | 0.010219  |
| 6             | 6             | 0           | -1.589642               | 1.116528  | 0.000047  |
| 7             | 1             | 0           | -3.353282               | -0.135502 | -0.021780 |
| 8             | 1             | 0           | -0.826855               | -1.425277 | 1.031925  |
| 9             | 1             | 0           | 0.305204                | 2.130635  | 0.034835  |
| 10            | 1             | 0           | -2.147773               | 2.043120  | 0.019875  |
| 11            | 6             | 0           | 2.010213                | 0.060364  | -0.001265 |
| 12            | 6             | 0           | 3.206898                | 0.074783  | 0.000016  |
| 13            | 1             | 0           | 4.272654                | 0.094624  | 0.001420  |
| 14            | 1             | 0           | 0.474919                | -2.169915 | -0.155591 |

**Table S26:** Equilibrium structure of **PA-3<sup>+</sup>** optimized at the  $\omega$ B97X-D/aug-cc-pVTZ level of theory

Standard orientation:

| Center<br>Number | Atomic<br>Number | Atomic<br>Type | Coordinates (Angstroms) |           |           |
|------------------|------------------|----------------|-------------------------|-----------|-----------|
|                  |                  |                | X                       | Y         | Z         |
| 1                | 6                | 0              | -2.215277               | 0.034618  | -0.019948 |
| 2                | 6                | 0              | -1.529812               | -1.217445 | -0.049858 |
| 3                | 6                | 0              | -0.125261               | -1.163219 | -0.068653 |
| 4                | 6                | 0              | 0.656923                | -0.004682 | -0.013530 |
| 5                | 6                | 0              | -0.075312               | 1.178055  | 0.007275  |
| 6                | 6                | 0              | -1.481023               | 1.189409  | 0.003488  |
| 7                | 1                | 0              | -3.295382               | 0.040952  | -0.019818 |
| 8                | 1                | 0              | -2.048328               | -2.161162 | -0.170788 |
| 9                | 1                | 0              | -0.886214               | -1.344056 | 1.043715  |
| 10               | 1                | 0              | 0.467226                | 2.114147  | 0.032447  |
| 11               | 1                | 0              | -1.989717               | 2.142945  | 0.021646  |
| 12               | 6                | 0              | 2.072089                | -0.049996 | -0.006560 |
| 13               | 6                | 0              | 3.267578                | -0.080794 | -0.003326 |
| 14               | 1                | 0              | 4.332991                | -0.108500 | -0.000525 |



**Table S27:** Equilibrium structure of **PA-4<sup>+</sup>** optimized at the  $\omega$ B97X-D/aug-cc-pVTZ level of theory

Standard orientation:

| Center<br>Number | Atomic<br>Number | Atomic<br>Type | Coordinates (Angstroms) |           |           |
|------------------|------------------|----------------|-------------------------|-----------|-----------|
|                  |                  |                | X                       | Y         | Z         |
| 1                | 6                | 0              | -2.177455               | 0.062915  | -0.060378 |
| 2                | 6                | 0              | -1.561452               | -1.200782 | -0.045631 |
| 3                | 6                | 0              | -0.136526               | -1.215592 | -0.024848 |
| 4                | 6                | 0              | 0.559536                | -0.025847 | -0.010403 |
| 5                | 6                | 0              | -0.140661               | 1.215730  | -0.006857 |
| 6                | 6                | 0              | -1.512680               | 1.280861  | -0.015854 |
| 7                | 1                | 0              | -1.985643               | -0.693505 | 1.049813  |
| 8                | 1                | 0              | -2.142255               | -2.107820 | -0.162323 |
| 9                | 1                | 0              | 0.379856                | -2.164340 | -0.026886 |
| 10               | 1                | 0              | 0.436433                | 2.130841  | 0.011410  |
| 11               | 1                | 0              | -2.044682               | 2.221279  | -0.006123 |
| 12               | 6                | 0              | 1.979575                | -0.017751 | 0.002753  |
| 13               | 6                | 0              | 3.175523                | 0.000409  | 0.013252  |
| 14               | 1                | 0              | 4.241126                | 0.013894  | 0.021907  |

**Table S28:** Equilibrium structure of **PA-8<sup>+</sup>** optimized at the  $\omega$ B97X-D/aug-cc-pVTZ level of theory

Standard orientation:

| Center<br>Number | Atomic<br>Number | Atomic<br>Type | Coordinates (Angstroms) |           |           |
|------------------|------------------|----------------|-------------------------|-----------|-----------|
|                  |                  |                | X                       | Y         | Z         |
| 1                | 6                | 0              | -1.623666               | -0.693774 | -0.486555 |
| 2                | 6                | 0              | -0.613702               | -1.415805 | 0.036335  |
| 3                | 6                | 0              | 0.477135                | -0.727820 | 0.757217  |
| 4                | 6                | 0              | 0.326629                | 0.700361  | 0.852263  |
| 5                | 6                | 0              | -0.677534               | 1.451439  | 0.263664  |
| 6                | 6                | 0              | -1.663462               | 0.731231  | -0.365386 |
| 7                | 1                | 0              | -2.432766               | -1.189604 | -1.003060 |
| 8                | 1                | 0              | -0.586282               | -2.494778 | -0.022982 |
| 9                | 1                | 0              | 0.908111                | -1.254902 | 1.606676  |
| 10               | 1                | 0              | -0.688157               | 2.530437  | 0.308450  |
| 11               | 1                | 0              | -2.496344               | 1.262391  | -0.809182 |
| 12               | 6                | 0              | 1.588568                | -0.170868 | -0.091253 |
| 13               | 6                | 0              | 2.512992                | 0.220342  | -0.756313 |
| 14               | 1                | 0              | 3.333681                | 0.575814  | -1.339738 |

**Table S29:** Equilibrium structure of **PA-10<sup>+</sup>** optimized at the  $\omega$ B97X-D/aug-cc-pVTZ level of theory

Standard orientation:

| Center<br>Number | Atomic<br>Number | Atomic<br>Type | Coordinates (Angstroms) |           |           |
|------------------|------------------|----------------|-------------------------|-----------|-----------|
|                  |                  |                | X                       | Y         | Z         |
| 1                | 6                | 0              | 2.055180                | 0.487253  | -0.000024 |
| 2                | 6                | 0              | 1.802605                | -0.881668 | -0.000021 |
| 3                | 6                | 0              | 0.512278                | -1.398369 | -0.000004 |
| 4                | 6                | 0              | -0.505316               | -0.460485 | 0.000009  |
| 5                | 6                | 0              | -0.194094               | 0.877820  | -0.000018 |
| 6                | 6                | 0              | 1.033763                | 1.452202  | 0.000004  |
| 7                | 1                | 0              | 3.078393                | 0.838366  | -0.000047 |
| 8                | 1                | 0              | 2.640508                | -1.563411 | -0.000027 |
| 9                | 1                | 0              | 0.316501                | -2.460223 | 0.000005  |
| 10               | 1                | 0              | -4.020694               | 0.553321  | -0.000060 |
| 11               | 6                | 0              | -3.028043               | 0.153432  | 0.000048  |
| 12               | 6                | 0              | -1.933263               | -0.392471 | 0.000034  |
| 13               | 1                | 0              | -1.704875               | 1.093258  | -0.000052 |
| 14               | 1                | 0              | 1.231507                | 2.512404  | 0.000012  |

**Table S30:** Equilibrium structure of **1-6<sup>+</sup>** optimized at the  $\omega$ B97X-D/aug-cc-pVTZ level of theory

Standard orientation:

| Center<br>Number | Atomic<br>Number | Atomic<br>Type | Coordinates (Angstroms) |           |           |
|------------------|------------------|----------------|-------------------------|-----------|-----------|
|                  |                  |                | X                       | Y         | Z         |
| 1                | 6                | 0              | 2.463276                | -0.259234 | 0.293636  |
| 2                | 6                | 0              | 1.482692                | 0.990873  | -0.064186 |
| 3                | 6                | 0              | 0.135852                | 1.146811  | -0.025399 |
| 4                | 6                | 0              | -0.704423               | -0.009572 | -0.046168 |
| 5                | 6                | 0              | 0.096917                | -1.201146 | -0.142823 |
| 6                | 6                | 0              | 1.372050                | -0.885409 | -0.269026 |
| 7                | 1                | 0              | 3.366999                | -0.116954 | -0.287938 |
| 8                | 1                | 0              | 2.112146                | 1.786755  | -0.438893 |
| 9                | 1                | 0              | -0.282647               | 2.137998  | -0.132968 |
| 10               | 1                | 0              | -0.274909               | -2.211247 | -0.046165 |
| 11               | 1                | 0              | 2.626769                | -0.386193 | 1.364930  |
| 12               | 6                | 0              | -2.087224               | -0.000023 | 0.041363  |
| 13               | 6                | 0              | -3.291224               | 0.011977  | 0.108111  |
| 14               | 1                | 0              | -4.355850               | 0.023973  | 0.167989  |

**Table S31:** Equilibrium structure of  $2-5^+$  optimized at the  $\omega$ B97X-D/aug-cc-pVTZ level of theory

Standard orientation:

| Center<br>Number | Atomic<br>Number | Atomic<br>Type | Coordinates (Angstroms) |           |           |
|------------------|------------------|----------------|-------------------------|-----------|-----------|
|                  |                  |                | X                       | Y         | Z         |
| 1                | 6                | 0              | -1.894820               | 0.330710  | -0.504424 |
| 2                | 6                | 0              | -0.740729               | 0.995409  | -0.426792 |
| 3                | 6                | 0              | 0.060456                | 1.602464  | 0.509411  |
| 4                | 6                | 0              | 0.376250                | -0.118752 | 0.244756  |
| 5                | 6                | 0              | -0.496615               | -1.232985 | 0.465593  |
| 6                | 6                | 0              | -1.742705               | -1.028352 | -0.031916 |
| 7                | 1                | 0              | -2.824299               | 0.783684  | -0.818133 |
| 8                | 1                | 0              | 1.015579                | 2.041636  | 0.254115  |
| 9                | 1                | 0              | -0.112075               | -2.169909 | 0.838542  |
| 10               | 1                | 0              | -2.536644               | -1.758355 | -0.054608 |
| 11               | 6                | 0              | 1.708065                | -0.241641 | -0.080102 |
| 12               | 6                | 0              | 2.880898                | -0.355873 | -0.358309 |
| 13               | 1                | 0              | 3.912764                | -0.465405 | -0.608615 |
| 14               | 1                | 0              | -0.360134               | 1.862481  | 1.479389  |

**Table S32:** Equilibrium structure of **2-7<sup>+</sup>** optimized at the  $\omega$ B97X-D/aug-cc-pVTZ level of theory

Standard orientation:

| Center<br>Number | Atomic<br>Number | Atomic<br>Type | Coordinates (Angstroms) |           |           |
|------------------|------------------|----------------|-------------------------|-----------|-----------|
|                  |                  |                | X                       | Y         | Z         |
| 1                | 6                | 0              | -2.260113               | -0.123365 | -0.091669 |
| 2                | 6                | 0              | -1.591682               | 1.118738  | -0.020806 |
| 3                | 6                | 0              | -0.226089               | 1.182551  | 0.051493  |
| 4                | 6                | 0              | 0.570374                | -0.008236 | 0.088759  |
| 5                | 6                | 0              | -0.127477               | -1.291916 | 0.013191  |
| 6                | 6                | 0              | -1.498645               | -1.245954 | -0.063730 |
| 7                | 1                | 0              | -3.339769               | -0.164170 | -0.158355 |
| 8                | 1                | 0              | -2.170914               | 2.031659  | -0.034236 |
| 9                | 1                | 0              | 0.286923                | 2.132765  | 0.081447  |
| 10               | 1                | 0              | 0.456316                | -2.203506 | 0.035709  |
| 11               | 1                | 0              | 0.258436                | -0.531894 | 1.167618  |
| 12               | 6                | 0              | 1.994496                | 0.042886  | -0.011014 |
| 13               | 6                | 0              | 3.183234                | 0.091670  | -0.113720 |
| 14               | 1                | 0              | 4.244419                | 0.136914  | -0.207210 |

**Table S33:** Equilibrium structure of **3-5<sup>+</sup>** optimized at the  $\omega$ B97X-D/aug-cc-pVTZ level of theory

Standard orientation:

| Center<br>Number | Atomic<br>Number | Atomic<br>Type | Coordinates (Angstroms) |           |           |
|------------------|------------------|----------------|-------------------------|-----------|-----------|
|                  |                  |                | X                       | Y         | Z         |
| 1                | 6                | 0              | -2.096123               | 0.033788  | -0.024152 |
| 2                | 6                | 0              | -1.482160               | -1.428139 | 0.132417  |
| 3                | 6                | 0              | -0.242920               | -0.906400 | -0.209299 |
| 4                | 6                | 0              | 0.659421                | 0.044033  | -0.088649 |
| 5                | 6                | 0              | -0.049944               | 1.312514  | 0.026803  |
| 6                | 6                | 0              | -1.445322               | 1.229225  | 0.043547  |
| 7                | 1                | 0              | -3.143830               | -0.038193 | -0.285847 |
| 8                | 1                | 0              | -1.981375               | -2.061673 | -0.599206 |
| 9                | 1                | 0              | -1.587893               | -1.805571 | 1.154902  |
| 10               | 1                | 0              | 0.518519                | 2.223398  | 0.141068  |
| 11               | 1                | 0              | -2.039409               | 2.132875  | 0.042255  |
| 12               | 6                | 0              | 2.060871                | -0.104515 | -0.015540 |
| 13               | 6                | 0              | 3.250010                | -0.206106 | 0.043461  |
| 14               | 1                | 0              | 4.310990                | -0.297238 | 0.095297  |

**Table S34:** Equilibrium structure of  $4-6^+$  optimized at the  $\omega$ B97X-D/aug-cc-pVTZ level of theory

Standard orientation:

| Center<br>Number | Atomic<br>Number | Atomic<br>Type | Coordinates (Angstroms) |           |           |
|------------------|------------------|----------------|-------------------------|-----------|-----------|
|                  |                  |                | X                       | Y         | Z         |
| 1                | 6                | 0              | -1.911488               | 0.101823  | -0.170853 |
| 2                | 6                | 0              | -1.791956               | -1.247865 | 0.128303  |
| 3                | 6                | 0              | -0.221673               | -1.088310 | -0.056337 |
| 4                | 6                | 0              | 0.553642                | 0.043179  | 0.029336  |
| 5                | 6                | 0              | -0.051237               | 1.325270  | 0.047107  |
| 6                | 6                | 0              | -1.484645               | 1.327291  | -0.042000 |
| 7                | 1                | 0              | -2.064444               | -1.542739 | 1.146662  |
| 8                | 1                | 0              | -2.126949               | -1.966270 | -0.617837 |
| 9                | 1                | 0              | 0.205705                | -2.030630 | -0.373631 |
| 10               | 1                | 0              | 0.503212                | 2.244763  | 0.154832  |
| 11               | 1                | 0              | -2.102160               | 2.211046  | 0.044098  |
| 12               | 6                | 0              | 1.970671                | -0.076350 | 0.008365  |
| 13               | 6                | 0              | 3.163189                | -0.163934 | -0.001325 |
| 14               | 1                | 0              | 4.225614                | -0.242793 | -0.009715 |



**Table S35:** Equilibrium structure of  $7-8^+$  optimized at the  $\omega$ B97X-D/aug-cc-pVTZ level of theory

Standard orientation:

| Center<br>Number | Atomic<br>Number | Atomic<br>Type | Coordinates (Angstroms) |           |           |
|------------------|------------------|----------------|-------------------------|-----------|-----------|
|                  |                  |                | X                       | Y         | Z         |
| 1                | 6                | 0              | 1.628373                | -0.837906 | -0.437515 |
| 2                | 6                | 0              | 0.613738                | -1.416695 | 0.212093  |
| 3                | 6                | 0              | -0.449487               | -0.751099 | 0.865226  |
| 4                | 6                | 0              | -0.394022               | 0.721303  | 0.816860  |
| 5                | 6                | 0              | 0.708544                | 1.343567  | 0.129992  |
| 6                | 6                | 0              | 1.663930                | 0.596231  | -0.476481 |
| 7                | 1                | 0              | 2.419490                | -1.413172 | -0.900221 |
| 8                | 1                | 0              | -1.063567               | -1.245133 | 1.607344  |
| 9                | 1                | 0              | 0.758626                | 2.422337  | 0.126368  |
| 10               | 1                | 0              | 2.488976                | 1.080994  | -0.979949 |
| 11               | 6                | 0              | -1.456972               | 0.008573  | -0.151827 |
| 12               | 6                | 0              | -2.386310               | -0.013652 | -0.921469 |
| 13               | 1                | 0              | -3.201279               | -0.035382 | -1.612785 |
| 14               | 1                | 0              | -0.969011               | 1.288418  | 1.537974  |

**Table S36:** Equilibrium structure of **7-9<sup>+</sup>** optimized at the  $\omega$ B97X-D/aug-cc-pVTZ level of theory

Standard orientation:

| Center<br>Number | Atomic<br>Number | Atomic<br>Type | Coordinates (Angstroms) |           |           |
|------------------|------------------|----------------|-------------------------|-----------|-----------|
|                  |                  |                | X                       | Y         | Z         |
| 1                | 6                | 0              | -2.164607               | 0.151052  | -0.301802 |
| 2                | 6                | 0              | -1.256895               | 1.174184  | -0.111951 |
| 3                | 6                | 0              | -0.161371               | 1.697151  | 0.091577  |
| 4                | 6                | 0              | 0.594980                | -0.148468 | 0.550494  |
| 5                | 6                | 0              | -0.286366               | -1.247366 | 0.186176  |
| 6                | 6                | 0              | -1.630178               | -1.119746 | -0.062110 |
| 7                | 1                | 0              | -3.160170               | 0.315273  | -0.686244 |
| 8                | 1                | 0              | 0.564560                | 2.450358  | 0.315191  |
| 9                | 1                | 0              | 0.196850                | -2.209040 | 0.063169  |
| 10               | 1                | 0              | -2.245903               | -1.993685 | -0.218651 |
| 11               | 6                | 0              | 1.908416                | -0.141497 | 0.030373  |
| 12               | 6                | 0              | 3.018451                | -0.135562 | -0.422110 |
| 13               | 1                | 0              | 4.009859                | -0.139428 | -0.815683 |
| 14               | 1                | 0              | 0.500223                | 0.198035  | 1.578330  |

**Table S37:** Equilibrium structure of **8-10<sup>+</sup>** optimized at the  $\omega$ B97X-D/aug-cc-pVTZ level of theory

Standard orientation:

| Center<br>Number | Atomic<br>Number | Atomic<br>Type | Coordinates (Angstroms) |           |           |
|------------------|------------------|----------------|-------------------------|-----------|-----------|
|                  |                  |                | X                       | Y         | Z         |
| 1                | 6                | 0              | -2.209373               | -0.038429 | -0.029796 |
| 2                | 6                | 0              | -1.518762               | 1.176045  | -0.014341 |
| 3                | 6                | 0              | -0.146021               | 1.205315  | 0.014738  |
| 4                | 6                | 0              | 0.555799                | -0.029002 | 0.005653  |
| 5                | 6                | 0              | -0.185522               | -1.207831 | 0.021666  |
| 6                | 6                | 0              | -1.540110               | -1.266922 | -0.012218 |
| 7                | 1                | 0              | -3.291200               | -0.033064 | -0.046664 |
| 8                | 1                | 0              | -2.080807               | -2.202814 | -0.018887 |
| 9                | 6                | 0              | 2.021845                | -0.062210 | -0.073239 |
| 10               | 6                | 0              | 3.229680                | -0.081737 | -0.070014 |
| 11               | 1                | 0              | 4.298400                | -0.103822 | -0.045429 |
| 12               | 1                | 0              | 0.404914                | 2.135558  | 0.031107  |
| 13               | 1                | 0              | -2.071198               | 2.103893  | -0.023078 |
| 14               | 1                | 0              | 1.494680                | -0.071121 | 1.048259  |

**Table S38:** Equilibrium structure of **9-11<sup>+</sup>** optimized at the  $\omega$ B97X-D/aug-cc-pVTZ level of theory

Standard orientation:

| Center<br>Number | Atomic<br>Number | Atomic<br>Type | Coordinates (Angstroms) |           |           |
|------------------|------------------|----------------|-------------------------|-----------|-----------|
|                  |                  |                | X                       | Y         | Z         |
| 1                | 6                | 0              | -1.086269               | -1.346559 | -0.375322 |
| 2                | 6                | 0              | 0.147764                | -1.457869 | 0.187289  |
| 3                | 6                | 0              | 1.258198                | -1.303413 | 0.701685  |
| 4                | 6                | 0              | -0.100591               | 1.603919  | 0.257004  |
| 5                | 6                | 0              | -1.355943               | 1.076736  | 0.275238  |
| 6                | 6                | 0              | -1.814321               | -0.181654 | -0.208810 |
| 7                | 1                | 0              | -1.496359               | -2.166658 | -0.950280 |
| 8                | 1                | 0              | 2.081756                | -1.353729 | 1.380862  |
| 9                | 1                | 0              | -2.136331               | 1.761003  | 0.582398  |
| 10               | 1                | 0              | -2.850005               | -0.206857 | -0.527507 |
| 11               | 6                | 0              | 1.083111                | 1.010020  | -0.225328 |
| 12               | 6                | 0              | 2.097865                | 0.463545  | -0.610856 |
| 13               | 1                | 0              | 3.010858                | 0.141809  | -1.061827 |
| 14               | 1                | 0              | 0.011195                | 2.636080  | 0.570960  |

**Table S39:** Equilibrium structure of **10-12<sup>+</sup>** optimized at the  $\omega$ B97X-D/aug-cc-pVTZ level of theory

Standard orientation:

| Center<br>Number | Atomic<br>Number | Atomic<br>Type | Coordinates (Angstroms) |           |           |
|------------------|------------------|----------------|-------------------------|-----------|-----------|
|                  |                  |                | X                       | Y         | Z         |
| 1                | 6                | 0              | 2.116719                | -0.311288 | 0.065519  |
| 2                | 6                | 0              | 1.660662                | 1.003803  | 0.107284  |
| 3                | 6                | 0              | 0.311875                | 1.296264  | 0.029066  |
| 4                | 6                | 0              | -0.587458               | 0.235851  | -0.121613 |
| 5                | 6                | 0              | -0.088887               | -1.051341 | -0.139829 |
| 6                | 6                | 0              | 1.229887                | -1.381459 | -0.065682 |
| 7                | 1                | 0              | 3.177558                | -0.511940 | 0.127251  |
| 8                | 1                | 0              | 2.372181                | 1.812548  | 0.189187  |
| 9                | 1                | 0              | -0.039249               | 2.318539  | 0.063784  |
| 10               | 1                | 0              | -3.412520               | -1.279463 | 0.605120  |
| 11               | 6                | 0              | -2.795099               | -0.475594 | 0.241808  |
| 12               | 6                | 0              | -2.047812               | 0.459917  | -0.177755 |
| 13               | 1                | 0              | -2.477695               | 1.406415  | -0.514637 |
| 14               | 1                | 0              | 1.580410                | -2.403013 | -0.103488 |

**Table S40:** Equilibrium structure of **10-13<sup>+</sup>** optimized at the  $\omega$ B97X-D/aug-cc-pVTZ level of theory

Standard orientation:

| Center<br>Number | Atomic<br>Number | Atomic<br>Type | Coordinates (Angstroms) |           |           |
|------------------|------------------|----------------|-------------------------|-----------|-----------|
|                  |                  |                | X                       | Y         | Z         |
| 1                | 6                | 0              | -1.991605               | -0.552890 | 0.160679  |
| 2                | 6                | 0              | -0.970073               | -1.460061 | -0.049999 |
| 3                | 6                | 0              | 0.233238                | -0.844761 | -0.337667 |
| 4                | 6                | 0              | 0.453797                | 0.511805  | -0.330184 |
| 5                | 6                | 0              | -0.579201               | 1.432296  | -0.047508 |
| 6                | 6                | 0              | -1.804017               | 0.857482  | 0.148920  |
| 7                | 1                | 0              | -2.986060               | -0.931859 | 0.359071  |
| 8                | 1                | 0              | -1.120151               | -2.528444 | -0.026376 |
| 9                | 1                | 0              | -0.409971               | 2.497702  | -0.005190 |
| 10               | 1                | 0              | -2.663137               | 1.485305  | 0.338009  |
| 11               | 6                | 0              | 1.728061                | 0.167286  | -0.029788 |
| 12               | 6                | 0              | 2.963389                | -0.118093 | 0.255473  |
| 13               | 1                | 0              | 3.215645                | -0.882962 | 0.979113  |
| 14               | 1                | 0              | 3.762133                | 0.401875  | -0.264181 |

**Table S41:** Equilibrium structure of **11-BCB<sup>+</sup>** optimized at the  $\omega$ B97X-D/aug-cc-pVTZ level of theory

Standard orientation:

| Center<br>Number | Atomic<br>Number | Atomic<br>Type | Coordinates (Angstroms) |           |           |
|------------------|------------------|----------------|-------------------------|-----------|-----------|
|                  |                  |                | X                       | Y         | Z         |
| 1                | 6                | 0              | -0.583264               | -1.503516 | -0.180383 |
| 2                | 6                | 0              | 0.615247                | -1.042354 | 0.182946  |
| 3                | 6                | 0              | 1.844167                | -0.611836 | 0.411103  |
| 4                | 6                | 0              | -0.583265               | 1.503516  | 0.180382  |
| 5                | 6                | 0              | -1.743610               | 0.680752  | 0.094412  |
| 6                | 6                | 0              | -1.743610               | -0.680753 | -0.094412 |
| 7                | 1                | 0              | -0.671254               | -2.508247 | -0.576998 |
| 8                | 1                | 0              | 2.574777                | -0.939717 | 1.136500  |
| 9                | 1                | 0              | -2.698759               | 1.171302  | 0.222989  |
| 10               | 1                | 0              | -2.698758               | -1.171303 | -0.222988 |
| 11               | 6                | 0              | 0.615246                | 1.042354  | -0.182946 |
| 12               | 6                | 0              | 1.844167                | 0.611836  | -0.411102 |
| 13               | 1                | 0              | 2.574776                | 0.939716  | -1.136500 |
| 14               | 1                | 0              | -0.671255               | 2.508247  | 0.576996  |

**Table S42:** Equilibrium structure of **12-BCB<sup>+</sup>** optimized at the  $\omega$ B97X-D/aug-cc-pVTZ level of theory

Standard orientation:

| Center<br>Number | Atomic<br>Number | Atomic<br>Type | Coordinates (Angstroms) |           |           |
|------------------|------------------|----------------|-------------------------|-----------|-----------|
|                  |                  |                | X                       | Y         | Z         |
| 1                | 6                | 0              | -1.981187               | -0.226989 | 0.091602  |
| 2                | 6                | 0              | -1.461992               | 1.094636  | 0.143977  |
| 3                | 6                | 0              | -0.131653               | 1.344565  | 0.004530  |
| 4                | 6                | 0              | 0.715640                | 0.235019  | -0.308301 |
| 5                | 6                | 0              | 0.148204                | -1.027084 | -0.372789 |
| 6                | 6                | 0              | -1.181146               | -1.325010 | -0.134137 |
| 7                | 1                | 0              | -3.041647               | -0.373611 | 0.250941  |
| 8                | 1                | 0              | -2.145215               | 1.911096  | 0.328953  |
| 9                | 1                | 0              | 0.277058                | 2.342430  | 0.081782  |
| 10               | 1                | 0              | 1.958668                | -1.020848 | 1.622718  |
| 11               | 6                | 0              | 1.923158                | -0.538952 | 0.662669  |
| 12               | 6                | 0              | 2.223598                | 0.225386  | -0.308596 |
| 13               | 1                | 0              | 2.992597                | 0.783862  | -0.812143 |
| 14               | 1                | 0              | -1.569191               | -2.332354 | -0.145989 |



**Table S43:** Equilibrium structure of **BCB-PE<sup>+</sup>** optimized at the  $\omega$ B97X-D/aug-cc-pVTZ level of theory

Standard orientation:

| Center<br>Number | Atomic<br>Number | Atomic<br>Type | Coordinates (Angstroms) |           |           |
|------------------|------------------|----------------|-------------------------|-----------|-----------|
|                  |                  |                | X                       | Y         | Z         |
| 1                | 6                | 0              | -0.802411               | 1.336598  | 0.001105  |
| 2                | 6                | 0              | 0.370044                | 0.747038  | 0.167207  |
| 3                | 6                | 0              | 0.744158                | -0.916162 | -0.351186 |
| 4                | 6                | 0              | -0.348316               | -1.175586 | 0.402844  |
| 5                | 6                | 0              | -1.710307               | -0.849261 | -0.039519 |
| 6                | 6                | 0              | -1.951150               | 0.455593  | -0.192902 |
| 7                | 1                | 0              | -0.889137               | 2.414868  | -0.030248 |
| 8                | 1                | 0              | -0.209438               | -1.573225 | 1.410977  |
| 9                | 1                | 0              | -2.449898               | -1.629272 | -0.145796 |
| 10               | 1                | 0              | -2.918782               | 0.852439  | -0.458609 |
| 11               | 6                | 0              | 2.063869                | -0.499710 | -0.274154 |
| 12               | 1                | 0              | 2.974695                | -1.002728 | -0.554331 |
| 13               | 6                | 0              | 1.806069                | 0.790303  | 0.175263  |
| 14               | 1                | 0              | 2.460823                | 1.605037  | 0.446066  |

## References

- B. Cunha de Miranda, C. Romanzin, S. Chefdeville, V. Vuitton, J. Žabka, M. Polášek, and C. Alcaraz. Reactions of state-selected atomic oxygen ions  $O^+$  ( $^4S$ ,  $^2D$ ,  $^2P$ ) with methane. *J. Phys. Chem. A*, 119(23):6082–6098, 2015. doi:[10.1021/jp512846v](https://doi.org/10.1021/jp512846v).
- K. M. Ervin and P. Armentrout. Translational energy dependence of  $Ar^+ + XY \rightarrow ArX^+ + Y$  ( $XY = H_2, D_2, HD$ ) from thermal to 30 eV c.m. *J. Chem. Phys.*, 83(1):166–189, 1985. doi:[10.1063/1.449799](https://doi.org/10.1063/1.449799).
